1 An Empirical Demonstration of Unsupervised Machine Learning in Species Delimitation

2

3 Shahan Derkarabetian<sup>1,2</sup>, Stephanie Castillo<sup>2,3</sup>, Peter K. Koo<sup>4</sup>, Sergey Ovchinnikov<sup>5</sup>, Marshal

4 Hedin<sup>2</sup>

5

6 *1. Department of Organismic and Evolutionary Biology, Museum of Comparative Zoology,*

7 *Harvard University, Cambridge, MA 02138*

8 *2. Department of Biology, San Diego State University, San Diego, CA 92182*

9 *3. Department of Entomology, University of California, Riverside, Riverside, CA 92521*

10 *4. Howard Hughes Medical Institute, Department of Molecular and Cellular Biology, Harvard*

11 *University, Cambridge, MA 02138*

12 *5. Center for Systems Biology, Harvard University, Cambridge, MA 02138*

13

14

15 Corresponding author: Shahan Derkarabetian

16 Department of Organismic and Evolutionary Biology

17 Museum of Comparative Zoology

18 Harvard University

19 Cambridge, MA 02138

20 sderkarabetian@gmail.com

21

## 22 ABSTRACT

23 One major challenge to delimiting species with genetic data is successfully differentiating  
24 species divergences from population structure, with some current methods biased towards  
25 overestimating species numbers. Many fields of science are now utilizing machine learning (ML)  
26 approaches, and in systematics and evolutionary biology, supervised ML algorithms have  
27 recently been incorporated to infer species boundaries. However, these methods require the  
28 creation of training data with associated labels. Unsupervised ML, on the other hand, uses the  
29 inherent structure in data and hence does not require any user-specified training labels, thus  
30 providing a more objective approach to species delimitation. In the context of integrative  
31 taxonomy, we demonstrate the utility of three unsupervised ML approaches, specifically random  
32 forests, variational autoencoders, and t-distributed stochastic neighbor embedding, for species  
33 delimitation utilizing a short-range endemic harvestman taxon (Laniatores, *Metanonychus*). First,  
34 we combine mitochondrial data with examination of male genitalic morphology to identify a  
35 priori species hypotheses. Then we use single nucleotide polymorphism data derived from  
36 sequence capture of ultraconserved elements (UCEs) to test the efficacy of unsupervised ML  
37 algorithms in successfully identifying a priori species, comparing results to commonly used  
38 genetic approaches. Finally, we use two validation methods to assess a priori species hypotheses  
39 using UCE data. We find that unsupervised ML approaches successfully cluster samples  
40 according to species level divergences and not to high levels of population structure, while  
41 standard model-based validation methods over-split species, in some instances suggesting that all  
42 sampled individuals are distinct species. Moreover, unsupervised ML approaches offer the  
43 benefits of better data visualization in two-dimensional space and the ability to accommodate  
44 various data types. We argue that ML methods may be better suited for species delimitation

45 relative to currently used model-based validation methods, and that species delimitation in a truly  
46 integrative framework provides more robust final species hypotheses relative to separating  
47 delimitation into distinct “discovery” and “validation” phases. Unsupervised ML is a powerful  
48 analytical approach that can be incorporated into many aspects of systematic biology, including  
49 species delimitation. Based on results of our empirical dataset, we make several taxonomic  
50 changes including description of a new species.

51

52

53 **Key Words:** Random Forest, t-SNE, Variational Autoencoders, ultraconserved elements,  
54 integrative taxonomy, Opiliones

55 Modern species delimitation is becoming increasingly objective relying on, for example,  
56 statistical thresholds and/or clustering algorithms to identify species in multivariate  
57 morphological space (e.g., Ezard et al. 2010; Seifert et al. 2014), or using the multispecies  
58 coalescent to identify the boundary between population and species level divergences using  
59 genetic data (e.g., Yang and Rannala 2010). Similarly, species delimitation is becoming  
60 increasingly integrative, combining multiple data types in a reciprocally-illuminating framework  
61 providing more robust final species hypotheses (Dayrat 2005; Schlick-Steiner et al. 2010). The  
62 empirical process of delimiting species has been portrayed by some authors as occurring in two  
63 separate phases (Carstens et al. 2013): a discovery phase where a priori hypotheses are formed  
64 based on one or more data types, followed by a validation phase where species hypotheses are  
65 further tested using an independent dataset, typically nuclear genetic data. Of utmost interest in  
66 using genetic data in species delimitation, whether as validation or otherwise, is successfully  
67 distinguishing population structure from species level divergences. Recently, Sukumaran and  
68 Knowles (2017) demonstrated that the multispecies coalescent model will support population  
69 level divergences, an assertion previously demonstrated empirically (e.g., Niemiller et al. 2012;  
70 Hedin et al. 2015).

71 Across many fields of science, a great deal of attention has been given to machine  
72 learning (ML) approaches, where an algorithm can be trained to make future decisions without  
73 user input. Recently, ML methods like random forest (RF; Breiman 2001) have been  
74 incorporated into systematics and evolutionary biology, with applications in barcoding (e.g.,  
75 Austerlitz et al. 2010), environmental DNA metabarcoding (e.g., Cordier et al. 2018), population  
76 genetics (e.g., Schrider and Kern 2016; Schrider and Kern 2018), and predicting cryptic diversity  
77 (Espíndola et al. 2016). Most relevant here is the use of RF in phylogeographic model selection

78 (Pudlo et al. 2016; Smith et al. 2017) and speciation/species delimitation (Pei et al. 2018; Smith  
79 and Carstens 2018) where it can be used as a validation tool distinguishing among multiple user-  
80 specified models given a priori information about the training data. Similarly, non-RF ML  
81 approaches have been used to model biogeographic processes (Sukumaran et al. 2015). In these  
82 examples a *supervised* ML approach is used, where simulated datasets based on user-specified  
83 priors are used as training data, and a classifier is built to choose among different models or  
84 species hypotheses given observed data. For example, the recently developed RF-based species  
85 delimitation program CLADES (Pei et al. 2018) approaches species delimitation as a  
86 classification issue. Here, a two-species model with varying divergence times and population  
87 sizes, with or without migration, is used to simulate the training datasets for classifier  
88 construction. Multiple population genetic summary statistics are computed for labeled training  
89 data and observed data with species hypotheses defined a priori. These statistics are used as  
90 variables to determine support for a priori species distinctiveness in the observed data.

91         While supervised approaches are indeed powerful, unsupervised ML may also be a useful  
92 approach to aid in species delimitation using the inherent structure in the data to cluster samples.  
93 Unsupervised ML can be conducted without a priori hypotheses regarding the underlying  
94 evolutionary model, population parameters, number of species, species assignment, or levels of  
95 parameter divergence needed to classify samples as different species. In unsupervised RF, the  
96 training data is a synthetic dataset based on the observed data representing the null hypothesis of  
97 no structure, and a classifier is built to distinguish the synthetic and observed datasets, thus  
98 uncovering underlying structure (if present) in the observed data. Many unsupervised ML  
99 algorithms for high-dimensionality data intrinsically perform reduction to a lower dimensional  
100 space, where the underlying data structure can be visualized. For example, Oltaenu et al. (2013)

101 take an unsupervised ML approach to visualizing and clustering barcode data via nonlinear  
102 dimension reduction and projection methods using multidimensional scaling and self-organizing  
103 maps. They show that these approaches successfully clustered named and unnamed species and  
104 suggested the possibility of undescribed species.

105 Many ML algorithms can be executed in an unsupervised manner, and while  
106 dimensionality reduction methods like principal components analyses and clustering algorithms  
107 like k-means are widely considered to be ML, we focus on three unsupervised ML approaches  
108 chosen to represent a diversity of ML algorithm types including one that has yet to be used in the  
109 field of systematics (Table 1): Random Forests (RF; Breiman 2001), Variational Autoencoders  
110 (VAE; Kingma and Welling 2013), and t-Distributed Stochastic Neighbor Embedding (t-SNE;  
111 van der Maaten and Hinton 2008). RF is an ensemble learning method that relies on  
112 classification trees and tree bagging (Breiman 1996; 2001). In RF most importantly, in a given  
113 classification tree if two samples appear at the same terminal node their “proximity score” is  
114 increased by one. Proximity scores for all pairs are averaged over bootstrap replicates to produce  
115 a final proximity matrix, which can be used in multidimensional scaling (MDS) and clustering. A  
116 Variational Autoencoder is a Bayesian approach that learns a distribution of the data using latent  
117 variables. It does so in two stages: 1) inference of the posterior distribution of latent variables  
118 and 2) generation of data sampled from a given set of latent values. Both stages are  
119 approximated by neural networks and optimized simultaneously via unsupervised learning.  
120 Widely-used in diverse fields (e.g., Bauer et al. 2015; Yoshida et al. 2016; Mallet et al. 2017), t-  
121 SNE is a non-linear dimensionality reduction algorithm that attempts to preserve probability  
122 distributions of distances among samples within a cluster but repels samples that are in different  
123 clusters in lower-dimensional space.

124 **Table 1.** Comparison of unsupervised machine learning methods used in this study.

| Method                                              | Purpose                          | Approach used              | General algorithm                                                                                                                                                                                                                                    | Relevant output                             |
|-----------------------------------------------------|----------------------------------|----------------------------|------------------------------------------------------------------------------------------------------------------------------------------------------------------------------------------------------------------------------------------------------|---------------------------------------------|
| Random Forest (RF)                                  | Classification and regression    | Supervised<br>Unsupervised | Ensemble method that grows many classification trees based on training data, runs input data down trees, and the classification with the most votes is chosen.                                                                                       | Proximity matrix                            |
| Variational Autoencoder (VAE)                       | Generative model                 | Unsupervised               | Compresses data through multiple encoding layers into latent variables, then un-compresses latent variables through multiple decoder layers into reconstructed data. Learns the marginal likelihood distribution of the data using latent variables. | Latent variables (two-dimensional encoding) |
| t-Distributed Stochastic Neighbor Embedding (t-SNE) | Data embedding and visualization | Unsupervised               | Constructs probability distribution of sample pairs, then minimizes divergence between high dimensional space and low dimension embedding, such that similar pairs are embedded nearby while dissimilar pairs are repelled.                          | Low dimensional embedding                   |

125

126           The purpose of this study was, in the context of integrative taxonomy, to explore and  
127 demonstrate the utility of unsupervised ML approaches in aiding species delimitation through  
128 successful identification of clusters corresponding to species, as corroborated by other traditional  
129 methods. First, in the discovery phase, we combine phylogenetic analysis of mitochondrial  
130 cytochrome oxidase subunit I (COI) and examination of morphology to generate a priori species  
131 hypotheses. Then, using single nucleotide polymorphisms (SNPs) derived from sequence capture  
132 of ultraconserved elements (UCEs) we demonstrate the ability of unsupervised ML approaches  
133 to successfully cluster identified a priori species, comparing three unsupervised ML approaches  
134 to commonly used methods. Finally, using UCE-derived SNPs and loci we validate species  
135 hypotheses using a standard delimitation method and a novel RF-based approach. We also  
136 demonstrate the utility of unsupervised ML on two previously published datasets.

## 137 MATERIALS AND METHODS

### 138 *Study System*

139 For this study we utilized a short-range endemic (SRE; Harvey 2002) arachnid taxon in  
140 the order Opiliones (commonly called harvestmen). SRE taxa tend to have low dispersal ability  
141 and high ecological constraints, which leads to high population genetic structure and allopatric  
142 distributions, likely driven by niche conservatism (Wiens and Graham 2005). These biological  
143 characteristics make SRE taxa ideal candidates for species delimitation analyses, with high  
144 probability for new species discovery. Studies in SRE harvestmen (and SRE taxa in general) tend  
145 to show a great deal of underestimated diversity with numerous harvestmen species still being  
146 described even from well-studied areas (e.g., Derkarabetian and Hedin 2014; DiDomenico and  
147 Hedin 2016; Starrett et al. 2016; Emata & Hedin 2016).

148 The Pacific Northwest endemic genus *Metanonychus* Briggs, 1971 is a cryophilic  
149 harvestman that prefers moist forests, typically found underneath rotting logs/bark and in leaf  
150 litter. The genus and all species/subspecies were described by Briggs (1971), and currently  
151 includes three species: *M. idahoensis*, *M. setulus* with five subspecies (*setulus*, *mazamus*,  
152 *cascadus*, *navarrus*, and *obrieni*), and *M. oregonus* with two subspecies (*oregonus* and  
153 *nigricans*) (Fig. 1). *Metanonychus* is an ancient lineage; in a recent phylogenomic analysis of the  
154 superfamily Travunioidea (which contains *Metanonychus*), more genetic divergence is seen  
155 between the two samples of *Metanonychus* than in divergences between the vast majority of  
156 pairs of sister genera across all Travunioidea (Derkarabetian et al. 2018). Despite the ancient  
157 origin of this group, relatively few species were described, even though all “subspecies” are  
158 easily differentiated based on apparently fixed differences in male genitalic morphology (Briggs  
159 1971). Recent systematic studies on related taxa corroborate the conservative nature of



160 subspecies in these SRE harvestmen (Derkarabetian and Hedin 2014). As such, and more  
161 importantly, we consider *Metanonychus* species limits relatively straightforward where the  
162 species are “obvious” making this an excellent system to test ML approaches.

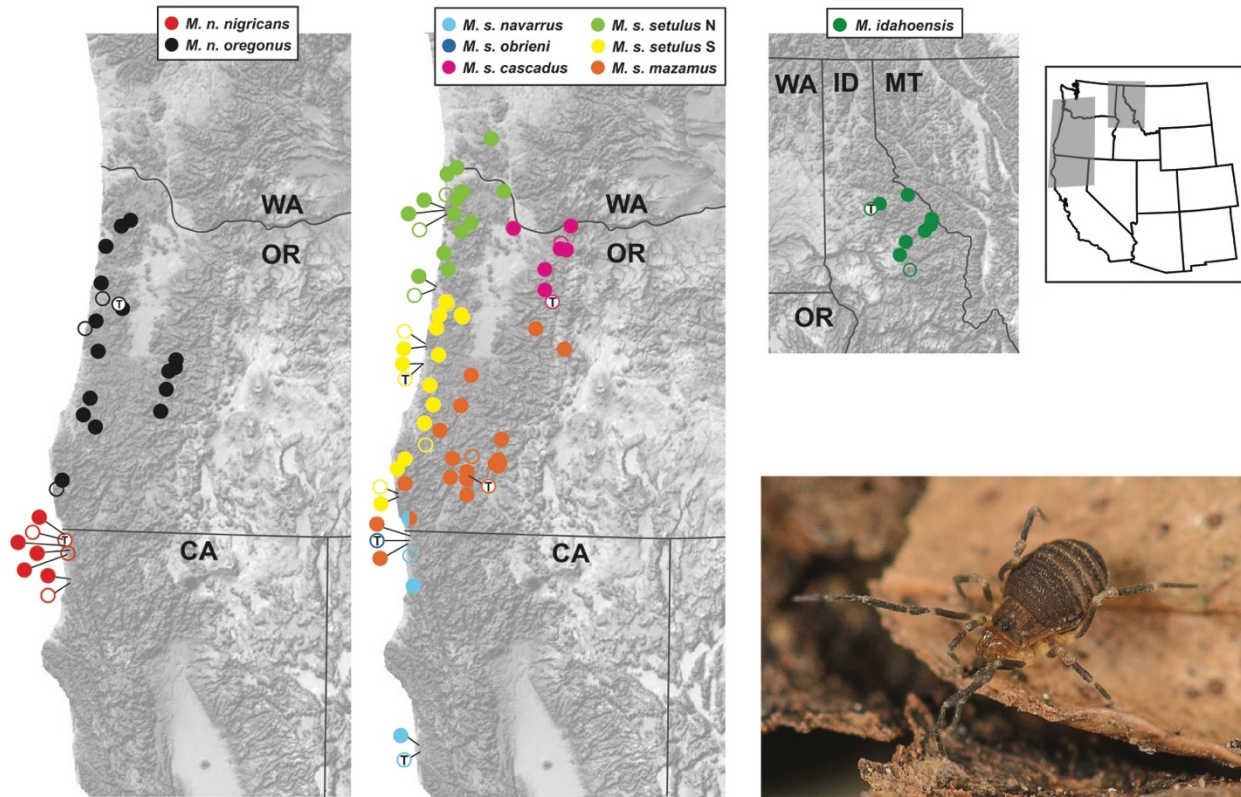

164 **Figure 1.** Geographic distribution of *Metanonychus*. Filled circles are collecting localities sampled for this study.  
165 Open circles are published records from Briggs (1971). Open circles with “T” indicate type localities. Live photo:  
166 *Metanonychus s. navarrus*.

### 167 *Species Delimitation Workflow*

168 We consider species as “separately evolving metapopulation lineages” (de Quieroz  
169 2007), that in practice are genetic clusters of samples corresponding to monophyletic lineages  
170 that show fixed morphological differences. For the discovery phase, our a priori species are  
171 based on inferred well supported COI clades and fixed differences in male genitalic morphology.  
172 We use two popular discovery-based genetic clustering approaches as “standards” to assess the  
173 utility and results of three ML methods. All SNP-based clustering analyses utilized the

174 adegenet/STRUCTURE formatted file (.str) as input, which allowed minimal file format  
175 conversion from “standard” to ML approaches.

### 176 *Species Discovery*

177         The COI gene was sequenced for at least one sample from every collecting locality, plus  
178 two outgroups from the sister genus *Sclerobunus*, using multiple primer combinations (online  
179 Appendix 1). DNA was extracted using the Qiagen DNeasy kit (Qiagen, Valencia, CA) using 2-3  
180 legs, PCR experiments followed Derkarabetian and Hedin (2014) and amplified fragments were  
181 Sanger sequenced at Macrogen USA. The Sanger-sequenced COI dataset was supplemented with  
182 COI sequences derived as “UCE-bycatch” (e.g., Zarza et al. 2017; Hedin et al. 2018) for all UCE  
183 samples (see below). COI sequences were manually aligned and a phylogeny was reconstructed  
184 using RAxML v.8 (Stamatakis 2014) with 500 bootstrap replicates and the GTRGAMMA  
185 model. COI divergence dating was conducted with BEAST 2.4.8 (Bouckaert et al. 2014) using  
186 two calibrations: a strict clock calibrated at 0.0178 (Papadopoulou et al. 2010), and a date  
187 calibration for the outgroups *S. nondimorphicus* (from coastal Oregon/Washington) and *S.*  
188 *idahoensis* (from Idaho), a well-known biogeographic break typically dated to 2-5 MY  
189 (Brunsfeld et al. 2001, and references therein), which was set to a uniform distribution of (2, 5).

190         The male genitalia in harvestmen tend to be species-specific and have been used in  
191 systematic studies across all taxonomic levels since the mid-1900s. We examined male genitalia  
192 for multiple samples of all described species/subspecies using standard scanning electron  
193 microscopy techniques. Images were taken using the FEI Quanta 450 FEG environmental SEM  
194 at the San Diego State University Electron Microscope Facility.

### 195 *Sequence Capture and SNPs*

196           The number of studies utilizing UCEs in species delimitation and SNP-based population  
197 level analyses are increasing (e.g., Smith et al. 2013; Blaimer et al. 2016; Harvey et al. 2016;  
198 McCormack et al. 2016; Newman and Austin 2016; Zarza et al. 2016; Starrett et al. 2017; Hedin  
199 et al. 2018). Extractions were conducted as above, except in most cases whole bodies were used  
200 in digestions. Sequence capture of UCE loci followed the protocols available from the  
201 ultraconserved.org website and as in Starrett et al. (2017) and Derkarabetian et al. (2018) using  
202 the Arachnida 1.1Kv1 myBaits kit (Arbor Biosciences) designed by Faircloth (2017).  
203 Sequencing was done at the Brigham Young University DNA Sequencing Center on a HiSeq  
204 2500 with 125 bp paired-end reads.

205           Raw reads were processed using phyluce (Faircloth 2005), adapter removal and quality  
206 control was done with an illumiprocessor wrapper (Faircloth 2013), and contigs were assembled  
207 with Trinity version r2013-02-25 (Grabherr et al. 2011). When matching contigs to probes,  
208 conservative values of 82 and 80 were used for minimum coverage and minimum identity,  
209 respectively, to filter potential non-target contamination (Bossert and Danforth 2018). Loci were  
210 aligned using MAFFT (Kato and Standley 2013) and trimmed using gblocks (Castresana 2000;  
211 Talavera and Castresana 2007) with settings --b1 0.5 --b2 0.5 --b3 10 --b4 4. All loci were  
212 manually inspected in Geneious (Kearse et al. 2012) to fix obvious alignment errors and filtered  
213 for obvious non-homologs. Contigs corresponding to COI were identified by a local BLAST  
214 search in Geneious against available *Metanonychus* COI sequences. Although not used in species  
215 delimitation, a concatenated matrix of UCE loci with 70% taxon coverage was used to  
216 reconstruct a phylogeny using RAxML with 500 bootstraps and the GTRGAMMA model.

217           SNP datasets were created from sequence capture reads using published approaches (e.g.,  
218 Zarza et al. 2017). The sample with the highest number of recovered UCE loci was used as a

219 reference genome (*M. idahoensis*, OP2432). After adapter removal and quality control, reads for  
220 all samples were aligned to the reference using bwa (Li and Durbin 2009), the resulting SAM  
221 files were sorted using samtools (Li et al. 2009), PCR duplicates were identified and removed  
222 using picard (<http://broadinstitute.github.io/picard>), and all BAM files were merged. The  
223 Genome Analysis Toolkit 3.2 (GATK; McKenna et al. 2010) was used to realign reads and  
224 remove indels and SNPs were then recalibrated using “best practices” (van der Auwera et al.  
225 2013). After recalibration SNPs were called and vcftools (Danecek et al. 2011) was used to  
226 create SNP datasets which varied in the percent of taxon coverage needed to include a SNP (50%  
227 and 70%). One random SNP from each locus was selected and the script `adegenet_from_vcf.py`  
228 ([github.com/mgharvey/seqcap\\_pop](https://github.com/mgharvey/seqcap_pop)) was used to create STRUCTURE-formatted (.str) files.

### 229 *Standard Genetic Clustering*

230 As a comparison for the efficacy of unsupervised ML methods in inferring structure and  
231 optimal clustering, we used two popular approaches. First, STRUCTURE version 2.3.4  
232 (Pritchard et al. 2000) was run for 1 million generations and 100,000 burnin on K values ranging  
233 from 2-10, with five replicates each. Structure Harvester (Earl and vonHoldt 2012) was used to  
234 determine optimal K via calculation of  $\Delta K$  (Evanno et al. 2005) and Clumpak (Kopelman et al.  
235 2015) was used to visualize output (<http://clumpak.tau.ac.il/>). Second, we used the adegenet R  
236 package (Jombart 2008; Jombart and Ahmed 2011) to conduct principal components analysis  
237 (PCA; `dudi.pca` function) and determine the optimal number of clusters and cluster assignment  
238 with discriminant analysis of principal components (DAPC) on scaled data.

### 239 *Unsupervised ML Visualization*

240 Three unsupervised ML approaches were used for clustering (see Table 1). We executed  
241 RF through the randomForest R package (Liaw and Wiener 2002), extracting the scaled data

242 from DAPC to a separate matrix. There are two important parameters associated with RF. The  
243 ntree parameter, the number of classification trees to create, was set to 5000. The mtry, the  
244 number of splits in the classification tree, was left at default for a classification analysis, which is  
245 square root the number of variables. The resulting proximity matrix was then used in both classic  
246 MDS (cMDS) and isotonic MDS (isoMDS). cMDS was executed using the MDSplot function in  
247 the randomForest package and isotonic MDS was conducted using the isoMDS function in the  
248 MASS R package (Venables and Ripley 2002).

249 VAE was implemented with a custom script utilizing the Keras python deep learning  
250 library (<https://keras.io>; Chollet 2015) and the TensorFlow machine learning framework  
251 ([www.tensorflow.org](http://www.tensorflow.org); Abadi et al. 2015). As input for VAE we use SNP matrices converted via  
252 “one-hot encoding” where each nucleotide is transformed into four binary variables unique to  
253 each nucleotide (e.g., A = 1,0,0,0; C = 0,1,0,0; etc.) including ambiguities (e.g., M = 0.5,0.5,0,0)  
254 using a custom script. The VAE is composed of an encoder and a decoder. The encoder takes the  
255 one-hot encoded SNP data and infers the distribution of latent variables, given as a normal  
256 distribution with a mean ( $\mu$ ) and standard deviation ( $\sigma$ ). The decoder then maps the latent  
257 distribution to a reconstruction of the one-hot encoded SNP data. As there are two latent  
258 variables, SNP data for each sample can be visualized as a reduced two-dimensional  
259 representation. Details of the VAE and the training procedure are in Supplementary File: Figure  
260 1.

261 t-SNE was executed using the R package tsne (Donaldson 2016). After preliminary  
262 testing, several parameters were specified: maximum iterations (max\_iter=5000), perplexity=5,  
263 initial dimensions (initial\_dims=5), and number of dimensions for the resulting embedding  
264 (k=2). The maximum iterations value is relatively straightforward to determine as the KL

265 divergence (a measure of the difference between high and low dimensional representations)  
266 should stabilize at a minimum. Perplexity is a measure of the balance between the local and  
267 global elements of the data; essentially how many neighbors a particular sample can have. This is  
268 a somewhat subjective parameter, where lower perplexity will produce tight well separated  
269 clusters, and higher values will produce more diffuse less distinguishable clusters. However,  
270 results and clusters are typically robust across a wide range of perplexity values (Pedregosa et al.  
271 2011) and methods have been introduced to make perplexity selection automatic (Cao and Wang  
272 2017). With large datasets it is recommended to perform dimensionality reduction on the data via  
273 PCA or a similar algorithm prior to implementing t-SNE (Pedregosa et al. 2011). As such, we  
274 perform t-SNE using the results of the initial PCA as input.

275         With RF and t-SNE, we also tested three different types of input format using the 70%  
276 SNP dataset. First, the SNPs were represented as raw nucleotides with ambiguities in standard  
277 IUPAC coding, extracted directly from .vcf files using the vcf2phylip script  
278 ([github.com/edgardomortiz/vcf2phylip](https://github.com/edgardomortiz/vcf2phylip)). Second, the raw SNPs were converted to haplotypes  
279 using the script SNPtoAFSready.py ([github.com/jordansatler/SNPtoAFS](https://github.com/jordansatler/SNPtoAFS)). Third, the raw  
280 unphased nucleotides were converted into numerical format via one-hot encoding. For the first  
281 two datasets, the Ns were coded as blank, and PCA could not be conducted as the variables are  
282 categorical. As such, t-SNE was run using the cMDS output.

### 283 *Unsupervised ML Clustering*

284         To assess the performance of clustering based on ML results relative to widely used  
285 STRUCTURE and DAPC approaches, four sets of clustering analyses were conducted using RF,  
286 VAE, and t-SNE outputs. First, to confirm that cluster assignments are equivalent to DAPC and  
287 STRUCTURE assignments, PAM clustering was conducted using the cluster R package



288 (Maechler et al. 2018) with the optimal K selected from DAPC. The next three clustering  
289 methods test whether the optimal K can be inferred correctly relying solely on unsupervised ML  
290 results. PAM clustering was done on all output, including both the proximity matrix and cMDS  
291 for RF, across K of 2-10 with the optimal K having the highest average silhouette width  
292 (Rousseeuw 1987). Next, PAM clustering was conducted with the optimal K determined via the  
293 gap statistic using k-means clustering implemented in the factoextra R package (Kassambara and  
294 Mundt 2017). Finally, optimal K and clusters were determined via hierarchical clustering with  
295 the mclust R package (Scrucca et al. 2017) using only components retained via the broken stick  
296 algorithm implemented in the PCDimension R package (Coombes and Wang 2018).

### 297 *Species validation*

298 We implement the commonly used Bayes Factor delimitation approach (\*BFD; Leaché et  
299 al. 2014) with SNAPP (Bryant et al. 2012) using a 70% UCE SNP matrix created by the phyluce  
300 script “phyluce\_snp\_convert\_vcf\_to\_snapp”. Multiple species hypotheses were tested based on  
301 current taxonomy, a priori species, ML clustering results, and an analysis where each individual  
302 specimen was treated as a unique species. SNAPP analyses were run with default settings for  
303 100,000 generations, 10,000 burnin, and 48 steps. Each analysis was run twice to ensure  
304 consistency. Bayes Factors (Kass and Raftery 1995) were calculated ( $2 * \log$  likelihood  
305 difference) to determine relative support of species hypotheses.

306 Next, we use the RF-based program CLADES (Pei et al. 2018), which uses Support  
307 Vector Machines, a type of supervised ML, to build a classifier based on labeled samples where  
308 samples are classified as either the same or different species. Several population genetic statistics  
309 are calculated for the simulated training data and the observed data, which are then treated as  
310 variables. The classifier is then used to infer whether the observed a priori species are equivalent

311 to the same or different species. As input we use the UCE loci in two different analyses: 1) an  
312 analysis validating a priori species hypotheses (“spp” dataset); and 2) an analysis in which every  
313 individual was treated as a distinct species (“ind” dataset).

#### 314 *Published Datasets*

315 *Uma notata complex.* – Gottscho et al. (2017) explored lineage diversification and species  
316 limits in fringe-toed lizards of the *Uma notata* species complex, a group with a complicated  
317 taxonomic history. Using ddRAD data they find significant levels of gene flow between multiple  
318 species and determine that *U. rufopunctata* is a hybrid population. Several genetic clustering  
319 algorithms were used with differing results: DAPC favored an optimal K=5 (grouping the hybrid  
320 *U. rufopunctata* with *U. cowlesi*), while a model with admixture favored an optimal K=6  
321 (splitting *U. scoparia* and showing varying levels of admixture for *U. rufopunctata* samples  
322 between *U. cowlesi* and *U. notata*). We reanalyzed their data with the intention of assessing  
323 unsupervised ML clustering/visualization in the face of significant gene flow and known hybrids.  
324 The published dataset with 597 SNPs was downloaded from Dryad  
325 (<https://doi.org/10.5061/dryad.8br5c>).

326 *Phrynosoma coronatum complex.* – The coast horned lizards of the genus *Phrynosoma*  
327 *coronatum* complex have received much attention with many species hypotheses put forth  
328 (summarized in Leaché et al. 2018). In an integrative approach Leaché et al. (2009) recover five  
329 well supported mtDNA clades that show little concordance with nuclear loci, ultimately  
330 integrating ecology and morphology to support three species (*P. blainvillii*, *P. cerroense*, and *P.*  
331 *coronatum*). More recently, Leaché et al. (2018) use SNP data coupled with \*BFD testing all  
332 hypotheses derived from previous research, ranging from one to six species. A five species  
333 model is given the highest support, reflecting mtDNA and splitting *P. blainvillii* into three



334 groups. Here, we use unsupervised ML methods for clustering, but more importantly to  
335 demonstrate their utility as a data visualization tool in a dataset showing high uncertainty in  
336 cluster probability assignments (fig. 1 of Leaché et al. 2018). Data were downloaded from dryad  
337 (<https://doi.org/10.5061/dryad.k7k4m>), and the SNP dataset in the .xml file was manually  
338 extracted and converted to .csv format for import into R.

## 339 **RESULTS**

### 340 *Species Discovery*

341 *Metanonychus* specimens were collected from 79 different collecting localities. A total of  
342 117 sequences were included in COI analyses (alignment length of 1182 bp); all new COI  
343 sequences have been deposited to GenBank (XXXX -XXXX). Seventy-seven sequences were  
344 acquired via Sanger sequencing and 38 were sequenced as UCE bycatch, with five samples being  
345 sequenced by both approaches, for a total of 110 *Metanonychus* specimens (plus two outgroups).  
346 UCE bycatch sequences possessed no stop codons, and for those samples sequenced via Sanger  
347 and as UCE bycatch, sequences were identical. COI divergence dating supports the ancient  
348 origin of this genus dating to ~25 Ma (Supplementary File: Fig. 2). The RAxML phylogeny  
349 recovers a deep split between the “*nigricans* group” containing both subspecies of *M. nigricans*  
350 and the “*setulus* group” containing *M. idahoensis* and *M. setulus* with all subspecies. Each  
351 currently named taxon is monophyletic with bootstrap support values of 100 (Supplementary  
352 File: Fig. 3), except the *setulus* subspecies is polyphyletic separated into geographically cohesive  
353 northern and southern clades, although support for relevant internal nodes are weak.

354 Male genitalic morphology show clear differences between all species/subspecies,  
355 including northern and southern clades of the *setulus* subspecies (Supplementary File: Fig. 4).

356 Taken together, the discovery phase identified eight a priori species corresponding to the  
357 currently named species/subspecies (except *obrieni*, Appendix 1) with the *setulus* subspecies  
358 split into two genetically divergent, geographically cohesive clades with fixed differences in  
359 genitalic morphology.

#### 360 *Sequence Capture and SNPs*

361 A total of 38 *Metanonychus* samples were included in UCE analyses, 36 of which were  
362 newly sequenced (online Appendix 1). Raw reads for sequence capture data have been deposited  
363 to SRA (XXXX). The 70% matrix included 185 loci (average of 158 per sample) with a mean  
364 locus length of 411 bp and a total length of 75,944 bp. The UCE phylogeny similarly confirms  
365 the monophyly of the *nigricans* and *setulus* groups and recovered the same clades as COI, but all  
366 internal nodes were fully supported (Supplementary File: Fig. 3). The *setulus* subspecies is  
367 recovered as monophyletic, albeit with reciprocally monophyletic northern and southern  
368 lineages. A 50% UCE matrix (278 loci, mean locus length of 384 bp, total length of 106,786 bp),  
369 produced an identical topology (not shown).

370 Due to the relatively high levels of divergence in *Metanonychus*, preliminary exploration  
371 of SNP datasets including all 38 samples resulted in datasets with too few loci or too sparse a  
372 matrix, with *M. nigricans* samples missing an average of ~60% of SNPs (~11% average samples  
373 in the *setulus* group). For the purposes of demonstrating ML clustering in *Metanonychus*, we  
374 focus on the monophyletic *setulus* group with six a priori species identified in the discovery  
375 phase. The *setulus* group included 30 samples and the 70% SNP dataset contained 316 SNPs  
376 (average of 250 per sample), while the 50% dataset contained 1263 SNPs (average of 774 per  
377 sample).

#### 378 *Standard Genetic Clustering*

379 For the 70% and 50% SNP datasets, both STRUCTURE ( $\Delta K$ ) and DAPC favored an  
380 optimal  $K=6$  (Fig. 2 a, b; Fig. 3; Supplementary File: Fig. 5 and Fig. 6), recovering all six a  
381 priori *setulus* group species as distinct clusters, including the separate clades of the *setulus*  
382 subspecies.

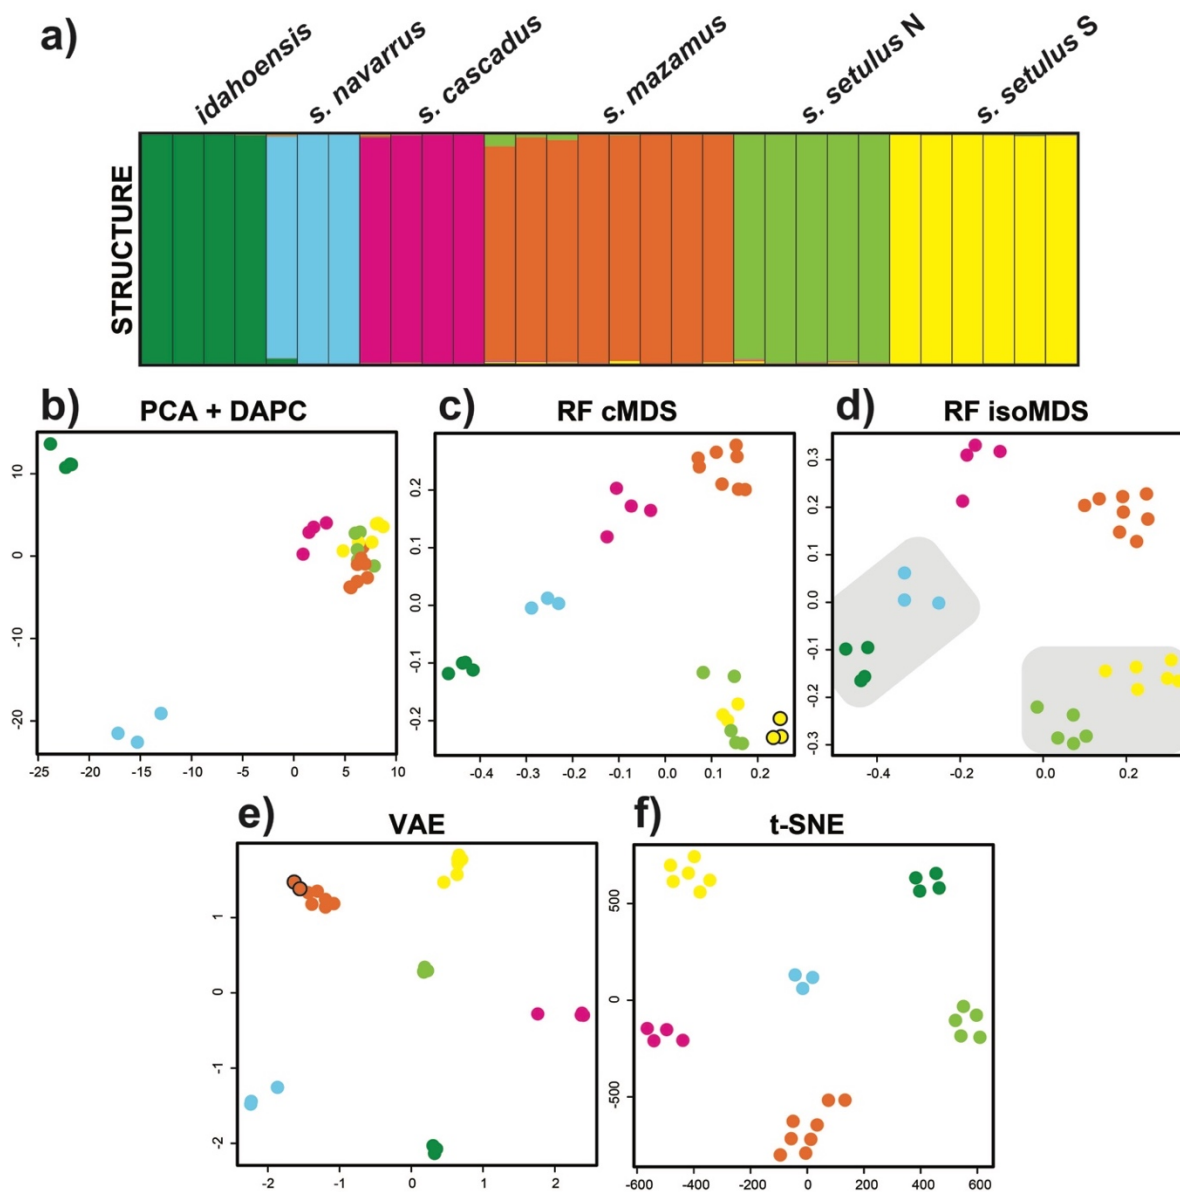

383  
384 **Figure 2.** Clustering results for the *Metanonychus* 70% SNP dataset. a) STRUCTURE plot. b) PCA plot with DAPC  
385 clusters. c) random forest cMDS plot, all clustering algorithms favored  $K=6$ , except hierarchical clustering with  $K=7$   
386 (seventh cluster indicated with black outline). d) random forest isoMDS plot, all clustering algorithms favored  $K=6$ ,  
387 except PAM clustering of RF output with  $K=4$  (lumped clusters are indicated with grey shading). e) VAE plot, all  
388 clustering algorithms favored  $K=6$ , except hierarchical clustering with  $K=7$  (seventh cluster indicated with black

389 outline). f) t-SNE plot, all clustering algorithms favored K=6. cMDS = classic multidimensional scaling, isoMDS =  
390 isotonic multidimensional scaling.

### 391 *Unsupervised ML*

392 Unsupervised ML analyses were relatively quick and computationally inexpensive taking  
393 1-3 minutes for each of the three algorithms when run locally. All ML analyses were run  
394 multiple times producing identical clustering results. For the 70% dataset, all clustering  
395 approaches for RF (cMDS and isoMDS), VAE, and t-SNE resulted in an optimal of K=6, with  
396 the exception of the cMDS with hierarchical clustering resulting in an optimal of K=7 splitting  
397 the southern clade of the *setulus* subspecies, and hierarchical clustering of VAE with an optimal  
398 of K=7 splitting *mazamus* (Fig. 2, Fig. 3). Importantly, all K=6 clustering assignments were  
399 identical to those from DAPC and STRUCTURE. For the 50% dataset, an optimal of K=6 was  
400 found for the majority of analyses (Supplementary File: Fig. 5 and Fig. 6). However, the cMDS  
401 using hierarchical clustering resulted in K=7, splitting the northern clade of the *setulus*  
402 subspecies, and hierarchical clustering of VAE resulted in K=7, splitting *mazamus*. Clustering of  
403 the 50% dataset based on isoMDS was more variable, with an optimal K=4 for hierarchical  
404 clustering and K=1 for the gap statistic. All VAE and t-SNE clusters were obvious. VAE clusters  
405 were robust, being recovered identically across five replicate analyses, and clear separation  
406 between clusters is seen when  $\sigma$  (standard deviation) is included (Supplementary File: Fig. 7). t-  
407 SNE clusters were robust to perplexity values from 5-25, after which samples became randomly  
408 dispersed (Supplementary File: Fig. 8). The unsupervised ML approaches produced plots with  
409 easier interpretability relative to PCA, with species clusters showing more separation in two-  
410 dimensional space. Similar plots for RF and t-SNE were obtained using input where SNPs were  
411 coded in multiple ways (Supplementary File: Fig. 9).

412

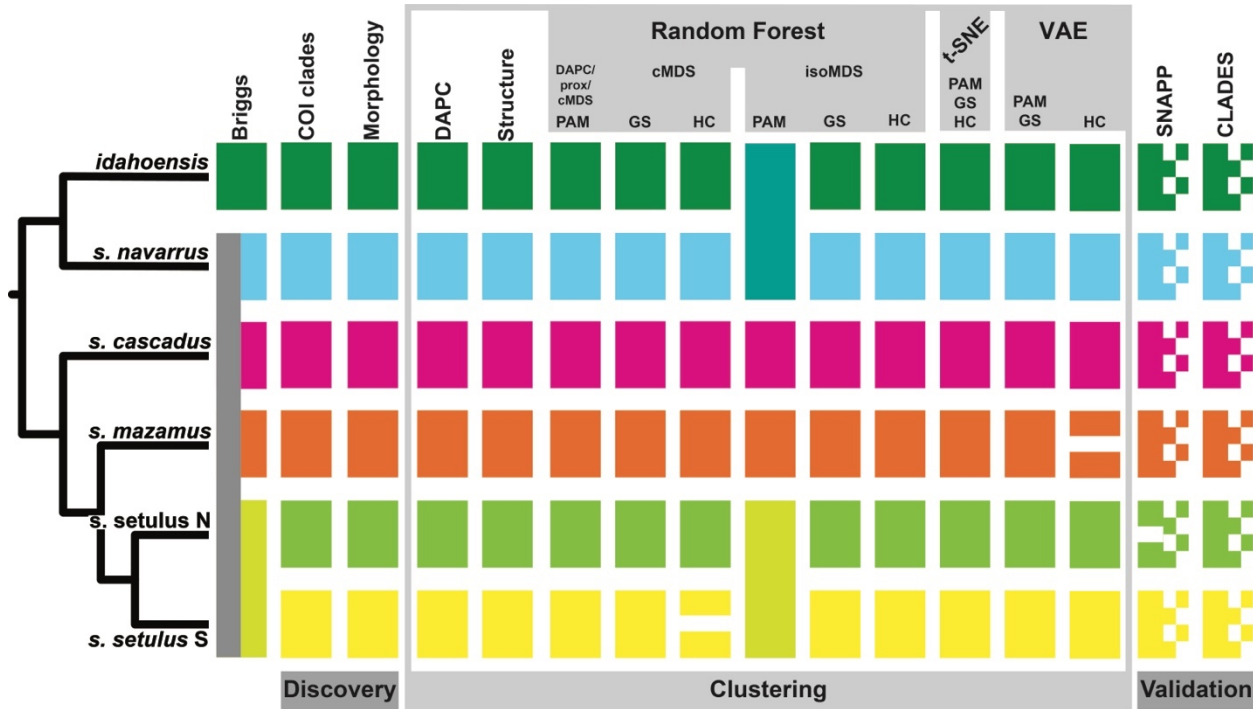

414 **Figure 3.** Integrative species delimitation results for the *Metanonychus* 70% SNP dataset. Species tree at left  
 415 adapted from RAxML analysis of 70% UCE dataset. GS = gap statistic, HC = hierarchical clustering.

416 *Species Validation*

417 \*BFD showed increasing likelihood with increasing species (Table 2), with Bayes  
 418 Factors heavily favoring the analysis in which all individual specimens were treated as distinct  
 419 species (K=30). Only considering hypotheses recovered in the discovery phase, the “7N” species  
 420 hypothesis was favored, recognizing all six a priori species plus two species in the northern clade  
 421 of the *setulus* subspecies. CLADES requires that each locus have data for at least one sample  
 422 within every a priori species. As a result, the “spp” dataset had 177 loci and the “ind” dataset had  
 423 12 loci. CLADES supported the species status of all six a priori species. However, species status  
 424 was also supported when each sample was treated as a distinct species (Fig. 3).

425 **Table 2.** Results of \*BFD hypothesis testing.

| Species | Justification                          | A        | B        | Bayes Factor |
|---------|----------------------------------------|----------|----------|--------------|
| 2       | Briggs' species                        | -3674.33 | -3885.74 | ~6924        |
| 4       | 70% isoMDS PAM, 50% isoMDS HC          | -2917.94 | -2910.14 | ~5192        |
| 5       | Briggs' species + subspecies           | -2384.94 | -2386.83 | ~4135        |
| 6       | a priori species                       | -2210.48 | -2211.17 | ~3785        |
| 7 M     | split <i>s. mazamus</i> : VAE HC       | -2135.1  | -2136.23 | ~3635        |
| 7 N     | split <i>s. setulus</i> N: 50% cMDS HC | -1797.95 | -1798.71 | ~2960        |
| 7 S     | split <i>s. setulus</i> S: 70% cMDS HC | -2165.62 | -2166.25 | ~3695        |
| 30      | all individuals                        | -320.3   | -316.24  | -            |

426

427 *Supplementary Material*

428 All *Metanonychus* input matrices (COI, UCE SNPs, UCE loci, and .csv files) are  
429 available from the Dryad Digital Repository: [http://dx.doi.org/10.5061/dryad.\[NNNN\]](http://dx.doi.org/10.5061/dryad.[NNNN]). Resulting  
430 phylogenies are available via TreeBASE (XXXX). Two custom scripts were created to run ML  
431 analyses: an R script to run random forest, t-SNE, and all clustering algorithms  
432 ([github.com/shahanderkarabetian/uml\\_species\\_delim](https://github.com/shahanderkarabetian/uml_species_delim)), and a python script to run VAE  
433 ([github.com/sokrypton/sp\\_deli](https://github.com/sokrypton/sp_deli)).

434 *Published Datasets*

435 *Uma notata complex*. – All clustering based on RF with cMDS favored a K=5 scenario,  
436 with cluster assignment identical to DAPC results, with the exception of hierarchical clustering  
437 favoring an optimal K=6 (Fig. 4). In this case, a distinct cluster was identified for all *U.*  
438 *rufopunctata* and two samples of *U. notata*. The optimal of K=6 recovered in Gottscho et al.  
439 (2017) does not differentiate *U. rufopunctata*, instead splitting *U. scoparia*. The cMDS plots do  
440 show two somewhat distinct samples of *U. scoparia*, which correspond to samples placed in the  
441 sixth cluster. Clustering results ranged from K=4 in PAM, lumping *U. cowlesi*, *U. notata*, and *U.*

442 *rufopunctata*, to K=7 in some replicates of t-SNE clustered with gap statistic splitting *U*.  
443 *scoparius*. The t-SNE and VAE plots recover the hybrid species *U. rufopunctata* as a linear  
444 “grade” between the parental species *U. cowlesi* and *U. notata*, and assignment uncertainty of the  
445 hybrid samples are seen when  $\sigma$  is also visualized (Supplementary File: Fig. 7).

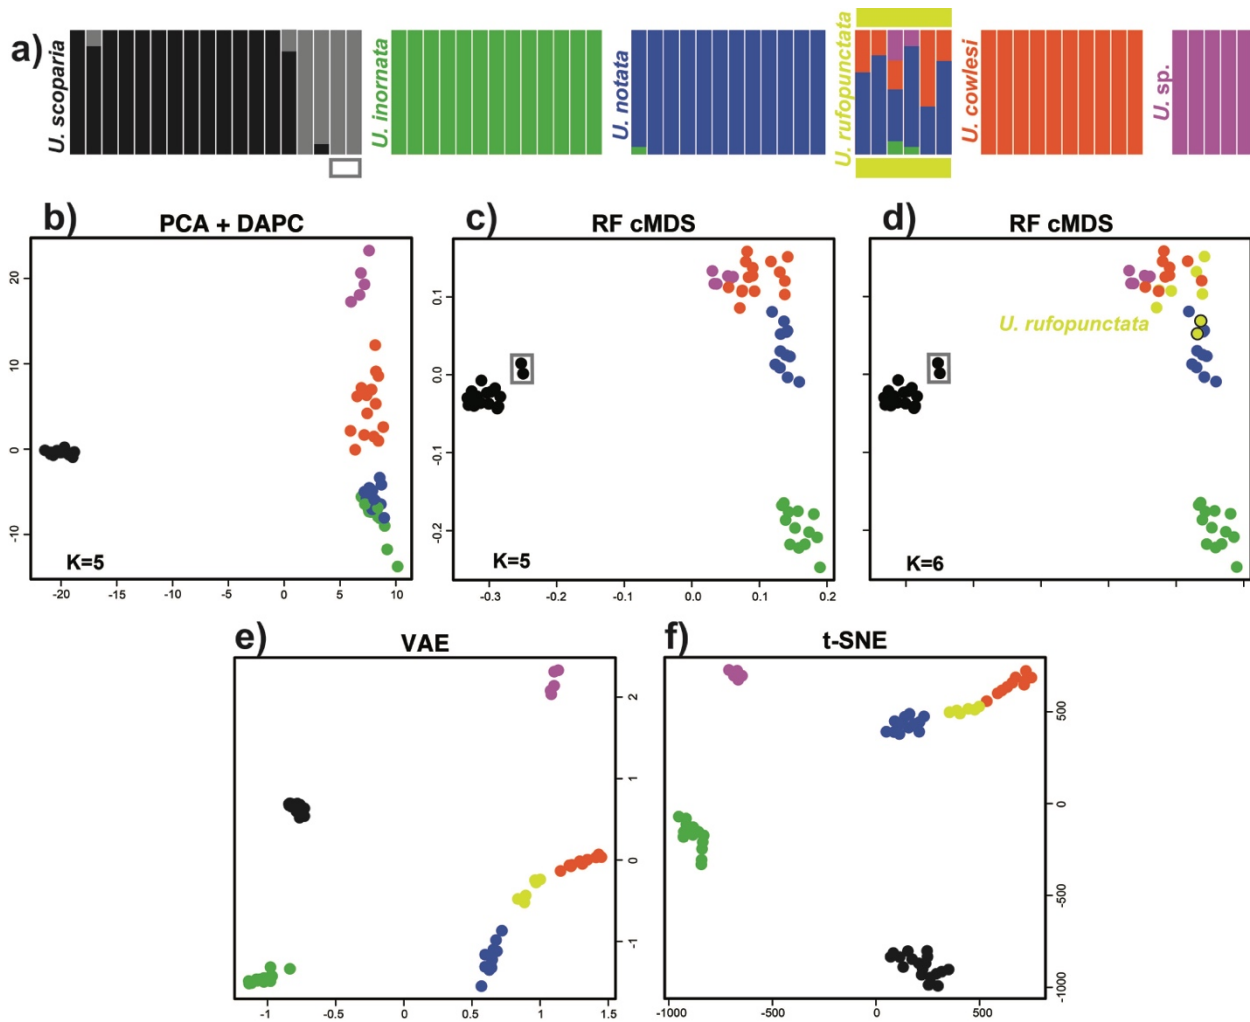

446

447 **Figure 4.** Clustering results for *Uma* dataset. a) STRUCTURE plot adapted from Gottscho et al. (2017). b) PCA  
448 with DAPC clusters. c) random forest cMDS plot with clusters identified via DAPC, PAM, and gap statistic. d)  
449 random forest cMDS plot with clusters identified via hierarchical clustering. e) VAE plot with K=6 a priori species.  
450 f) t-SNE plot with K=6 a priori species. Species are color coded as in Gottscho et al. (2017). Note: algorithmic  
451 clustering was only conducted on random forest output.

452 *Phrynosoma coronatum complex*. – As expected, clustering via DAPC, RF, VAE, and t-

453 SNE with nuclear SNP data did produce groups congruent with mitochondrial clades, with the

454 exception of *P. coronatum* (Fig. 5). DAPC favored K=4 (*P. coronatum*, southern *P. cerroense*,



455 northern CA *P. blainvillii*, and northern *P. cerroense* + the rest of *P. blainvillii*, while PAM  
 456 clustering favored K=2. The differing cluster assignments of *P. cerroense* lineages reflects their  
 457 polyphyly in the SNP phylogeny of Leaché et al. (2018). While all plots arrange samples in a  
 458 way reflective of their genetic similarity, the more diffuse spatial arrangement of samples in the  
 459 t-SNE embedding and the  $\sigma$  of the VAE are particularly informative and reflective of cluster  
 460 probability assignments for *P. blainvillii* samples (Fig. 5d and Supplementary File: Fig. 7).

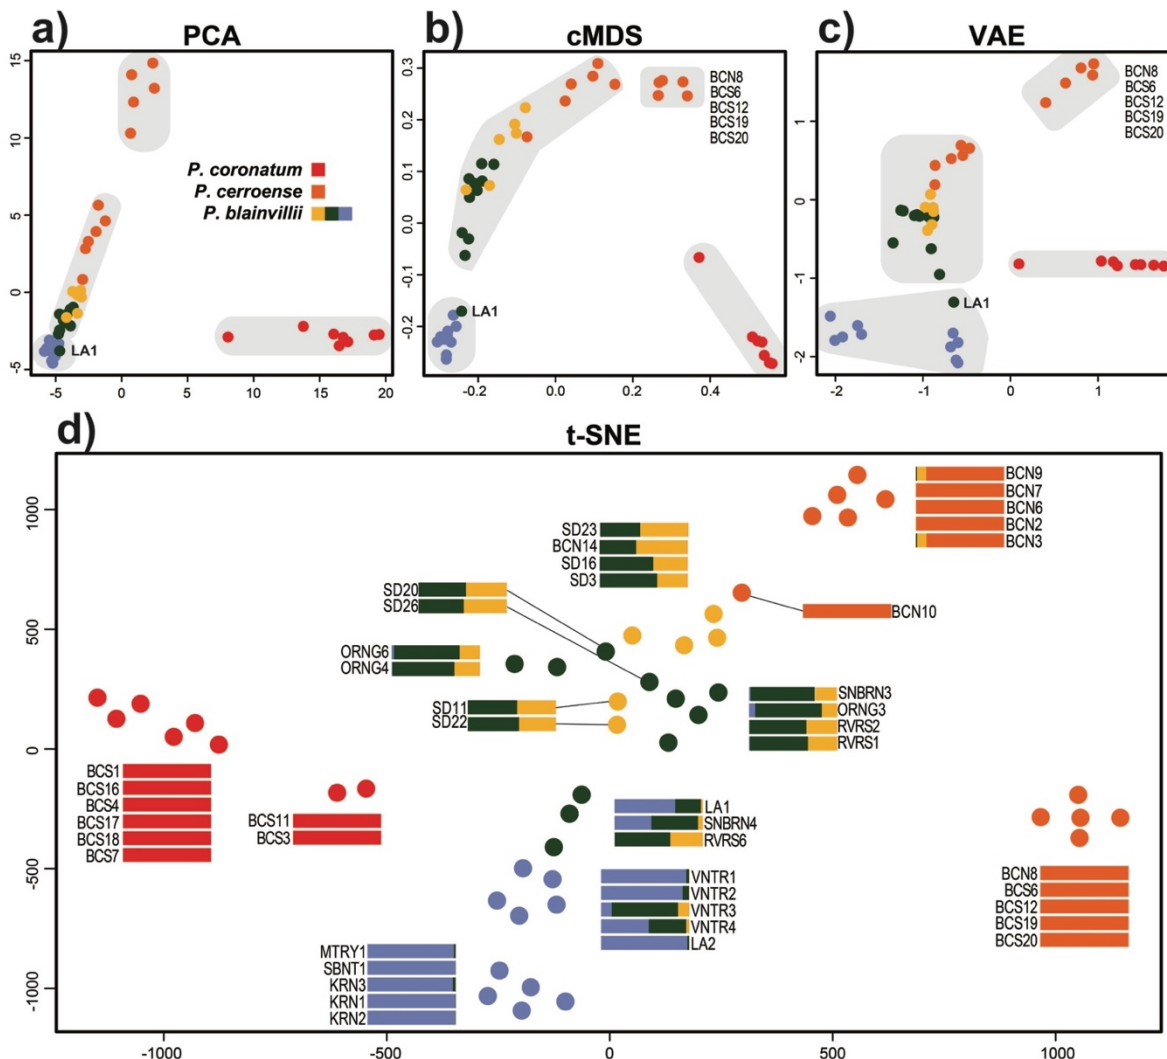

461  
 462 **Figure 5.** Clustering results for *Phrynosoma* dataset. a) PCA plot. b) random forest cMDS plot. c) VAE plot. For  
 463 parts a-c) samples are colored by mtDNA clades recovered in Leaché et al. (2009), and grey boxes indicate optimal  
 464 clustering of K=4 recovered via DAPC. d) t-SNE embedding, with corresponding assignment uncertainty for each  
 465 sample adapted from Leaché et al. (2018). Samples are color coded as in Leaché et al. (2018).



## 466 **DISCUSSION**

### 467 *Reconsidering (SRE) Species Delimitation*

468 Commonly used validation approaches relying on genomic-scale data have the potential  
469 to identify population structure and oversplit taxa (e.g., Sukumaran and Knowles 2017), a  
470 problem that can be exacerbated when studying SRE taxa with inherently high levels of  
471 population structure. Model-based validation analyses relying on the multispecies coalescent as  
472 currently implemented (e.g., BPP, SNAPP) seek to identify separate panmictic gene pools. This  
473 approach may not be suitable for *all* taxa given the diversity of biological characteristics unique  
474 to particular groups or organismal types with differing degrees of population structure and  
475 isolation, etc. (Sukumaran and Knowles 2017). While the issue of population structure in species  
476 delimitation has recently come under focus from a methodological perspective, the potential  
477 misinterpretation of population structure as species level divergences in empirical data has been  
478 a concern for taxonomists focusing on SRE taxa for a relatively long time (e.g., Hedin 1997), and  
479 continues to be so (e.g., Boyer et al. 2007; Bond and Stockman 2008; Niemiller et al. 2012;  
480 Barley et al. 2013; Satler et al. 2013; Fernández and Giribet 2014; Hedin 2015; Hedin et al.  
481 2015).

482 Unsupervised ML clustering of SNP data provided reasonable species hypotheses that  
483 were largely identical to commonly used discovery-based analyses. However, when used with  
484 validation methods, the same data supported unrealistic results severely overestimating the  
485 number of species. Most importantly, clusters identified in unsupervised ML approaches  
486 obviously correspond to species, implying that cluster separation was dominated by species-level  
487 divergences and not population structure. If validation analyses show increasing support for  
488 more complex species delimitation models, up to the most unrealistically complex model

489 possible given the data (i.e., each individual specimen as a distinct species), those analyses do  
490 not contribute useful information to the final species hypotheses. Similarly, the possibility of the  
491 most complex model being favored, whether actually tested or not, makes “support” for any less  
492 complex alternative models meaningless. If we did not run the K=30 SNAPP analysis or the  
493 “ind” analysis in CLADES, a more realistic 6-7 species hypothesis would be favored validating  
494 all a priori species, without any consideration of more complex hypotheses that are actually more  
495 likely. For *Metanonychus*, validation analyses were effectively ignored in the formation of final  
496 species hypotheses, and the information content of the SNP dataset was squandered, not being  
497 used to its full potential. While \*BFD/SNAPP is useful for testing alternative assignment  
498 hypotheses, its use as a validation tool to determine the number of species is certainly  
499 problematic for SRE taxa, and more broadly for any taxon with significant population structure.

500       Because model-based validation analyses have the potential to delimit population level  
501 divergences, that does not mean they *only* identify population-level divergences. However, the  
502 confirmation that validation analyses are operating at the species level can only be assessed when  
503 species delimitation is conducted in an integrative framework, and we reiterate the statement by  
504 Sukumaran and Knowles (2017) that external information (i.e., different data types) are needed  
505 to confirm delimitations made based on genetic-only analyses. Ultimately, we argue that the  
506 separation of empirical species delimitation into two distinct phases (discovery and validation)  
507 limits the potential utility of the “validation” data type in informing species hypotheses in a truly  
508 integrative manner. Data types used in the discovery phase inform the a priori species hypotheses  
509 used as input for the validation phase, but the data type used in validation does not reciprocally  
510 inform the other data types. Ideal integrative taxonomy as described by Schlick-Steiner et al.

511 (2010) utilizes multiple data types in a reciprocally illuminating framework where discordance  
512 between datasets requires consideration of the underlying biological processes.

### 513 *Machine Learning in Species Delimitation*

514 The goal of this study was to explore how well unsupervised ML methods can  
515 successfully identify clusters equivalent to species and correctly infer the expected number of  
516 clusters. We argue that species delimitation in *Metanonychus* was relatively “simple” showing  
517 essentially no discordance between datasets and provided an excellent study system to explore  
518 novel approaches. In an integrative framework, our results suggest that the expected number of  
519 species, determined via mitochondrial and morphological analyses, can be correctly inferred  
520 across multiple clustering algorithms using the RF distances, the latent variables of VAE, and the  
521 t-SNE embeddings. Most importantly, unsupervised ML approaches coupled with standard  
522 clustering algorithms did not oversplit the data by distinguishing samples based on population-  
523 level structure, but instead formed clear clusters equivalent to species-level divergences. While  
524 these unsupervised approaches seemingly work well with relatively clear species, their ability to  
525 correctly cluster samples in more difficult speciation scenarios (e.g., rapid and recent divergence,  
526 divergence with gene flow, etc.) remains to be tested, although results in *Uma* are promising.

527 For unsupervised RF, more consistent and “accurate” clustering was achieved using the  
528 cMDS output. Like DAPC, multiple dimensions are used to inform the optimal clustering  
529 strategy. Conversely, isoMDS by default only outputs two dimensions for clustering. isoMDS  
530 may be suitable for significantly diverged taxa, in which case it can sometimes produce a better  
531 two-dimensional visualization of the data relative to cMDS. VAE and t-SNE clusters were  
532 exceedingly obvious regardless of data type, and robust across multiple iterations and varying  
533 parameters. t-SNE was designed purely for the visualization of high dimensional data, although

534 given a low dimensional embedding as output, clustering is an obvious application. It has been  
535 noted that t-SNE clusters, cluster size, and distances between clusters may not have any relevant  
536 meaning (Wattenberg et al. 2016) and clusters should be interpreted with caution. As t-SNE does  
537 not preserve the density of actual clusters completely, density-based clustering algorithms (Ester  
538 et al. 1996; Campello et al. 2013) may offer an improvement relative to other clustering  
539 approaches. Regardless, in the datasets used here, inferred clusters have obvious biological  
540 meaning corresponding to species which were corroborated by other analyses and data types.  
541 More consistent and accurate clustering results were obtained with the 70% taxon coverage  
542 dataset. Samples with a higher percentage of missing data might be reconstructed in closer  
543 proximity by unsupervised ML methods, regardless of phylogenetic proximity, simply because  
544 they share high levels of missing data. This is particularly the case with data converted to one-  
545 hot format where a missing SNP was coded as “0,0,0,0”, although we designed our VAE to mask  
546 missing data.

547       Neural networks have mostly been designed/used for identifying the latent space of  
548 images, the most relevant examples including the citizen science natural history observational  
549 platform iNaturalist ([www.inaturalist.org](http://www.inaturalist.org)) and classification of ants (Boer and Vos 2018). Here  
550 we show that VAEs, which leverage neural networks to learn a probability distribution of the  
551 data, can learn phylogenetic structure with the latent variables. In contrast to t-SNE, VAEs are  
552 nicely derived from formal Bayesian probability theory, and can hence be used to score the  
553 probability that the new data belongs to a trained set of data or is a new species. The standard  
554 deviation around samples/clusters is an inherent result of a VAE analysis and visualization  
555 makes the assessment of cluster distinctiveness or uncertainty relatively straightforward. One  
556 drawback is that it is not straightforward when to stop training a VAE. Overtraining a VAE can

557 lead to overfitting the data, which results in clusters that are still present, but the probability  
558 distribution over the data is less general, and hence cannot be used reliably for downstream  
559 analysis. One solution is to partition a small fraction of the training data as a validation set,  
560 which can be used to determine when training should be stopped, a technique in ML known as  
561 early stopping (Goodfellow et al. 2016), although we use a “dropout” approach to prevent  
562 overfitting. Given results presented here, the robustness of output to parameter variation, and its  
563 Bayesian nature, VAEs are very promising for future incorporation into systematic applications.

564         Data visualization is an important aspect of empirical research. With genetic data,  
565 whether used as loci or SNPs, this can be in the form of a phylogeny or via a dimensionality  
566 reduction method. Regardless of whether downstream clustering is performed, unsupervised ML  
567 methods like t-SNE and VAE offer excellent options for relatively quick and informative data  
568 visualization that can help examine uncertainty in a priori groupings or recognize  
569 misidentifications and paraphyly, both of which are problematic for species hypotheses if data  
570 are destined for downstream model-based analyses. The placement of hybrid populations of *Uma*  
571 and the arrangement of assignment uncertainty in *Phrynosoma* are displayed in low-dimensional  
572 space in spatially meaningful ways. The recently developed Uniform Manifold Approximation  
573 and Projection method (McInnes and Healy 2018) is a dimensionality reduction technique  
574 similar to t-SNE but with numerous benefits including better preservation of global structure and  
575 potential embedding in larger dimensional space benefitting downstream clustering.

576         Unsupervised ML methods do not make assumptions about data type (e.g., genetic versus  
577 morphological, etc.); data are merely treated as data. If approaches that are not specifically  
578 designed for a particular data type successfully identify/corroborate a priori species, the resulting  
579 species decisions are more robust. However, the underlying assumption is that the analyses are

580 operating at the species level. As with many dimensionality reduction techniques, unsupervised  
581 ML methods will uncover any underlying structure regardless of the taxonomic level or type of  
582 data. As such, integrative taxonomy with multiple data types and analytical approaches is ideal.  
583 Conversely, this insensitivity to taxonomic scale makes unsupervised ML relevant to population  
584 level analyses and phylogeography as well as species delimitation in taxa across varying  
585 divergence times, for example, divergences of ~20 Ma in the *Metanonychus setulus* group down  
586 to much more recent species divergences of <1 Ma reported for *Uma* (Gottscho et al. 2017).

587 An additional appeal of some ML approaches is their ability to be conducted in a “semi-  
588 supervised” manner, where some samples can be labeled (e.g., assigned to a species) while  
589 others are left unassigned. For example, semi-supervised analyses could be used for species  
590 assignment of samples with unknown determination, like females of *Metanonychus*, or in taxa  
591 where the vast majority of specimens are known from juveniles that cannot be identified to  
592 species (e.g., Hedin et al. 2018). While fully supervised approaches have been used for this same  
593 reason, for example with COI barcoding (e.g., Weitschek et al. 2014; Archer et al. 2017),  
594 utilizing a semi-supervised ML approach (e.g., McInnes and Healy 2018) saves the need for  
595 creating a training dataset and associated assumptions. In either case, given the increasing  
596 incorporation of museum specimens in genomic analyses (McCormack et al. 2016; Blaimer et al.  
597 2016; Ruane and Austin 2017; Sproul and Maddison 2017) it is now feasible to directly include  
598 type specimens in species delimitation. In the case of semi-supervised methods, type specimens  
599 (or specimens from type localities, etc.) can be included in analyses as labeled data while all  
600 other samples are left unlabeled, or in a supervised approach, data from type specimens could be  
601 used in training dataset construction.

602           If model testing is integral to the study it seems more logical, particularly in cases where  
603 genetic data is the only reliable way to assess species limits (i.e., cryptic species), to rely on  
604 algorithms that utilize prior information in the form of training data based on parameters  
605 associated with the particular biological characteristics of a given organismal type, thus taking  
606 the biology of the organism more directly into account. For potential future analyses of SRE  
607 harvestmen using supervised ML methods, training data could consist of multiple “curated” SRE  
608 datasets where species are known and well-supported, which would then be used for SRE taxa  
609 with unknown or uncertain numbers of species. While CLADES oversplit *Metanonychus*  
610 supporting every individual as a species, we do not see this as a negative for the approach, but  
611 rather as imperative to create and use curated training datasets reflecting the biological  
612 characteristics of the study organism to fully leverage the power of this approach. More recently,  
613 Smith and Carstens (2018) developed delimitR, a supervised ML approach that treats species  
614 delimitation as a classification problem, using the binned multidimensional Site Frequency  
615 Spectrum as the predictor variable to build an RF classifier that can distinguish among different  
616 speciation models, the response variables, selecting the model with the most votes. Training data  
617 is simulated based on specification of several priors (guide tree, population size, divergence time,  
618 migration) either known or estimated for the particular study system. DelimitR is a promising  
619 approach as priors are used to create the simulated data for classifier construction, making the  
620 analysis more specific to the biology of the focal taxon.

621           In general, unsupervised ML approaches offer the benefits of better data visualization in  
622 two-dimensional space and the ability to accommodate various data types. Like current methods  
623 combining multiple data types into a single analysis (e.g., Guillot et al. 2012; Solis-Lemus et al.  
624 2015), it may be feasible to do an integrative unsupervised ML analysis where various data types

625 (e.g., morphological, genetic, chemical profiles, etc.) are combined into a single dataset for  
626 downstream clustering. Many ML algorithms are well-suited for species delimitation, providing  
627 promising avenues of incorporation into standard systematics protocols and excellent resources  
628 are available for implementation (e.g., <http://scikit-learn.org>, <https://keras.io>,  
629 [www.tensorflow.org](http://www.tensorflow.org)). ML algorithms, even those designed for image analysis or pattern and text  
630 recognition, all seek to identify and learn the underlying structure of input data via  
631 dimensionality reduction of some form. This can be leveraged for all data types in diverse ways,  
632 for example, representing a multidimensional vector of population genetic statistics as an image  
633 to be analyzed via neural networks (Kern and Schrider 2018). As recently discussed in regard to  
634 population genetics (Schrider and Kern 2018), with a basic understanding of the types of ML  
635 algorithms, the applications to species delimitation become obvious and exciting with the  
636 potential to aid in all aspects of systematic biology.

### 637 *Learning from Metanonychus*

638 Multiple data types and analytical approaches favor six species in the *setulus* group,  
639 providing robust final species hypotheses. Although some analyses favored more than six  
640 species, we prefer more conservative species hypotheses that are robust to data and analysis type  
641 (e.g., Carstens et al. 2013). As a result of integrative species delimitation, we elevate all  
642 subspecies of the *setulus* group to full species, now consisting of *M. idahoensis*, *M. navarrus*  
643 **new comb.**, *M. cascadius new comb.*, *M. mazamus new comb.*, and *M. setulus*. In addition, all  
644 analyses supported the northern clade of the *setulus* subspecies as a distinct species, which we  
645 describe as ***M. xxxx n. sp.*** Derkarabetian and Hedin (Appendix 1). Based on examination of type  
646 specimens, *M. obrieni* is synonymized with *M. navarrus* (Appendix 1). The *nigricans* group had  
647 too few samples for reliable clustering when analyzed alone. However, both the morphological



648 divergence seen in male genitalia and nuclear divergence supports elevating the *M. nigricans*  
649 subspecies to full species: *M. nigricans*, and *M. oregonus* **n. comb.** Based on our results, we  
650 reiterate that the subspecies rank common in several groups of SRE harvestmen are conservative  
651 estimates considering these “subspecies” also show fixed morphological differences that were  
652 used for the initial diagnosis.

653 *Metanonychus* is a relatively ancient genus, persisting in mesic forests of the Pacific  
654 Northwest since the late Oligocene, and its species are relatively old dating up to ~10 Ma with  
655 extremely high levels of population divergence. From a biogeographical perspective, it is  
656 interesting to note that *M. idahoensis* from northern Idaho is recovered as sister to *M. navarrus*  
657 from northern California, to the exclusion of all taxa from Oregon and Washington. The break  
658 between mesic forests of Idaho and coastal Oregon/Washington is found in numerous taxa  
659 typically attributed to the formation of the Cascades dating to 2-5 Ma (Brunsfeld et al. 2001, and  
660 references therein). Divergence dating analyses here estimate that the split between *M.*  
661 *idahoensis* and *M. navarrus* is much older, dating to ~12 Ma (average K2P-corrected COI  
662 divergence of 16.8%) suggesting the possibility of an older connection and divergence between  
663 these regions. Further exploration of this result in the context of Pacific Northwest biogeography  
664 is needed (e.g., Brunsfeld et al. 2001, Steele et al. 2005; Carstens and Richards 2007). These  
665 results reaffirm the importance of SRE taxa and their inclusion in exploring and elucidating,  
666 sometimes unexpected, patterns of regional biogeography and geologic history (e.g., Boyer and  
667 Giribet 2009; Hedin et al. 2013; Emata and Hedin 2016).

668 **FUNDING**

669 This work was supported by the National Science Foundation (grant number DEB  
670 #1354558 to M.H.) and a National Science Foundation Doctoral Dissertation Improvement Grant  
671 (grant number DEB #1601208 to S.D.).

## 672 ACKNOWLEDGEMENTS

673 For assistance during fieldwork we thank Casey Richart, James Starrett, Alan Cabrero,  
674 Erik Ciaccio, and Morganne Sigismonti. The initial inspiration for this work was provided by Ty  
675 Roach. We thank Nick Vinciguerra for help during SNP processing and Morganne Sigismonti  
676 for assisting with initial morphological examinations. Type specimen loans were kindly provided  
677 by Darrell Ubick (California Academy of Sciences). An earlier version of the manuscript was  
678 improved through discussion with Jeet Sukumaran.

## 679 REFERENCES

- 680 Abadi M., Barham P., Chen J., Chen Z., Davis A., Dean J., Devin M., Ghemawat S., Irving G.,  
681 Isard M., Kudlur M., Levenberg J., Monga R., Moores S., Murray D.G., Steiner B., Tucker  
682 P., Vasudevan V., Warden P., Wicke M., Yu Y., Zheng X. 2016. Tensorflow: a system for  
683 large-scale machine learning. *12<sup>th</sup> USENIX Symposium on Operating Systems Design and  
684 Implementation* 16:265-283. <https://www.tensorflow.org/>
- 685 Archer F.I., Martien K.K., Taylor B.L. 2017. Diagnosability of mtDNA with Random Forests:  
686 Using sequence data to delimit subspecies. *Mar. Mam. Sci.* 33:101-131  
687 <https://doi.org/10.1111/mms.12414>
- 688 Austerlitz F., David O., Schaeffer B., Bleakley K., Olteanu M., Leblois R., Veuille M., Laredo C.  
689 2009. DNA barcode analysis: A comparison of phylogenetic and statistical classification  
690 methods. *BMC Bioinformatics* 10:S10 <https://doi.org/10.1186/1471-2105-10-S14-S10>

- 691 Barley A.J., White J., Diesmos A.C., Brown R.M. 2013. The challenge of species delimitation at  
692 the extremes: diversification without morphological change in Philippine sun skinks.  
693 *Evolution* 67:3556-3572. <https://doi.org/10.1111/evo.12219>
- 694 Bauer E., Laczny C.C., Magnúsdóttir S., Wilmes P., Thiele I. 2015. Phenotypic differentiation of  
695 gastrointestinal microbes is reflected in their encoded metabolic repertoires. *Microbiome*  
696 3:55 <https://doi.org/10.1186/s40168-015-0121-6>
- 697 Blaimer B.B., Lloyd M.W., Guillory W.X., Brady S.G. 2016. Sequence capture and phylogenetic  
698 utility of genomic ultraconserved elements obtained from pinned insect specimens. *PLoS*  
699 *One* 11:e0161531 <https://doi.org/10.1371/journal.pone.0161531>
- 700 Blaimer B.B., LaPolla J.S., Branstetter M.G., Lloyd M.W., Brady S.G. 2016. Phylogenomics,  
701 biogeography and diversification of obligate mealybug-tending ants in the genus *Acropyga*.  
702 *Mol. Phylogenet. Evol.* 102:20-29 <https://doi.org/10.1016/j.ympev.2016.05.030>
- 703 Boer M.J.A., Vos R.A. Taxonomic Classification of Ants (Formicidae) from Images using Deep  
704 Learning. *BioRxiv*. <https://doi.org/10.1101/407452>
- 705 Bond J.E., Stockman A.K. 2008. An integrative method for delimiting cohesion species: finding  
706 the population-species interface in a group of Californian trapdoor spiders with extreme  
707 genetic divergence and geographic structuring. *Syst. Biol.* 57:628-646.  
708 <https://doi.org/10.1080/10635150802302443>
- 709 Bossert S., Danforth B.N. 2018 On the universality of target-enrichment baits for phylogenomic  
710 research. *Methods Ecol. Evol.* 9:1453-1460 <https://doi.org/10.1111/2041-210X.12988>
- 711 Bouckaert R., Heled J., Kühnert D., Vaughan T., Wu C.H., Xie D., Suchard M.A., Rambaut A.,  
712 Drummond A.J. 2014 BEAST 2: a software platform for Bayesian evolutionary analysis.  
713 *PLoS Comput. Biol.* 10:e1003537 <https://doi.org/10.1371/journal.pcbi.1003537>

- 714 Boyer S.L., Baker J.M., Giribet G. 2007. Deep genetic divergences in *Aoraki denticulata*  
715 (Arachnida, Opiliones, Cyphophthalmi): a widespread ‘mite harvestman’ defies DNA  
716 taxonomy. *Mol. Ecol.* 16:4999-5016 <https://doi.org/10.1111/j.1365-294X.2007.03555.x>
- 717 Boyer S.L., Giribet G. 2009. Welcome back New Zealand: regional biogeography and  
718 Gondwanan origin of three endemic genera of mite harvestmen (Arachnida, Opiliones,  
719 Cyphophthalmi). *J. Biogeogr.* 36:1084-1099 <https://doi.org/10.1111/j.1365-2699.2009.02092.x>
- 720
- 721 Breiman L. 1996. Bagging predictors. *Mach. Learn.* 24:123-140  
722 <https://doi.org/10.1007/BF00058655>
- 723 Breiman L. 2001. Random Forests. *Mach. Learn.* 45:5–32  
724 <https://doi.org/10.1023/A:1010933404324>.
- 725 Briggs T.S. 1971. The harvestmen of family Triaenonychidae in North America (Opiliones).  
726 *Occas. Pap. Cal. Acad. Sci.* 90:1-43.
- 727 Brunsfeld, S.J., Sullivan J., Soltis D.E., Soltis P.S. 2001. Comparative phylogeography of  
728 northwestern North America: a synthesis. Pages 319–339 in *Integrating ecology and*  
729 *evolution in a spatial context*. (J. Silvertown and J. Antonovics, eds.). Blackwell Publishing,  
730 Williston, Vermont.
- 731 Bryant D., Bouckaert R., Felsenstein J., Rosenberg N.A., RoyChoudhury A. 2012. Inferring  
732 species trees directly from biallelic genetic markers: bypassing gene trees in a full coalescent  
733 analysis. *Mol. Biol. Evol.* 29:1917-1932 <https://doi.org/10.1093/molbev/mss086>
- 734 Cao Y., Wang L. 2017 Automatic Selection of t-SNE Perplexity. [arXiv:1708.03229v1](https://arxiv.org/abs/1708.03229v1) [cs.AI]
- 735 Campello R.J.G.B., Moulavi D., Sander J. 2013 Density-based clustering based on hierarchical  
736 density estimates. In *Advances in Knowledge Discovery and Data Mining* (Pei J., Tseng V.S.,

- 737 Cao L., Motoda H., Xu G. eds.). PAKDD 2013. Lecture Notes in Computer Science, vol  
738 7819. Springer, Berlin, Heidelberg
- 739 Carstens B.C., Richards C.L. 2007. Integrating coalescent and ecological niche modeling in  
740 comparative phylogeography. *Evolution* 61:1439-1454 [https://doi.org/10.1111/j.1558-](https://doi.org/10.1111/j.1558-5646.2007.00117.x)  
741 [5646.2007.00117.x](https://doi.org/10.1111/j.1558-5646.2007.00117.x)
- 742 Carstens B.C., Pelletier T.A., Reid N.M., Satler J.D. 2013. How to Fail at Species Delimitation.  
743 *Mol. Ecol.* 22: 4369–4383 <https://doi.org/10.1111/mec.12413>
- 744 Castresana J. 2000. Selection of conserved blocks from multiple alignments for their use in  
745 phylogenetic analysis. *Mol. Biol. Evol.* 17:540-552  
746 <https://doi.org/10.1093/oxfordjournals.molbev.a026334>.
- 747 Coombes K.R., Wang M. 2018. PCDimension: Finding the Number of Significant Principal  
748 Components. R package version 1.1.9
- 749 Chollet F. 2015 Keras. <https://keras.io>
- 750 Cordier T., Forster D., Dufresne Y., Martins C.I., Stoeck T., Pawlowski J. 2018. Supervised  
751 machine learning outperforms taxonomy-based environmental DNA metabarcoding applied  
752 to biomonitoring. *Mol. Ecol. Resour.* In press. <https://doi.org/10.1111/1755-0998.12926>
- 753 Danecek P., Auton A., Abecasis G., Albers C.A., Banks E., DePristo M.A., Handaker R.E.,  
754 Lunter G., Marth G.T., Sherry S.T., McVean G., Durbin R., 1000 Genomes Project Analysis  
755 Group. 2011. The variant call format and VCFtools. *Bioinformatics* 27:2156-2158  
756 <https://doi.org/10.1093/bioinformatics/btr330>
- 757 Dayrat B. (2005) Towards integrative taxonomy. *Biol. J. Linn. Soc.* 85.:407-417  
758 <https://doi.org/10.1111/j.1095-8312.2005.00503.x>

- 759 de Queiroz K. 2007. Species Concepts and Species Delimitation. *Syst. Biol.* 56:879–86  
760 <https://doi.org/10.1080/10635150701701083>
- 761 Derkarabetian S., Hedin M. 2014. Integrative taxonomy and species delimitation in harvestmen:  
762 a revision of the western North American genus *Sclerobunus* (Opiliones: Laniatores:  
763 Travunioidea). *PLoS ONE* 9:e104982. <https://doi.org/10.1371/journal.pone.0104982>
- 764 Derkarabetian S., Starrett J., Tsurusaki N., Ubick D., Castillo S., Hedin M. 2018. A stable  
765 phylogenomic classification of Travunioidea (Arachnida, Opiliones, Laniatores) based on  
766 sequence capture of ultraconserved elements. *ZooKeys* 760:1-36  
767 <https://doi.org/10.3897/zookeys.760.24937>
- 768 DiDomenico A., Hedin M. 2016. New species in the *Sitalcina sura* species group (Opiliones,  
769 Laniatores, Phalangodidae), with evidence for a biogeographic link between California desert  
770 canyons and Arizona sky islands. *ZooKeys* 586:1-36  
771 <https://doi.org/10.3897/zookeys.586.7832>
- 772 Donaldson J. 2016. tsne: T-Distributed Stochastic Neighbor Embedding for R (t-SNE). R  
773 package version 0.1-3.
- 774 Earl D.A., vonHoldt B.M. 2012. STRUCTURE HARVESTER: a website and program for  
775 visualizing STRUCTURE output and implementing the Evanno method. *Conserv. Genet.*  
776 *Resour.* 4:359-361 <https://doi.org/10.1007/s12686-011-9548-7>
- 777 Emata K.N., Hedin M. 2016. From the mountains to the coast and back again: Ancient  
778 biogeography in a radiation of short-range endemic harvestmen from California. *Mol.*  
779 *Phylogenet. Evol.* 98:233-243 <https://doi.org/10.1016/j.ympev.2016.02.002>

- 780 Espíndola A., Ruffley M., Smith M.L., Carstens B.C., Tank D.C., Sullivan J. 2016 Identifying  
781 cryptic diversity with predictive phylogeography. *Proc. R. Soc. B.* 283:20161529  
782 <https://doi.org/10.1098/rspb.2016.1529>
- 783 Ester M., Kriegel H.P., Sander J., Xu X. 1996. A density-based algorithm for discovering  
784 clusters in large spatial databases with noise. In *Proceedings of Second International*  
785 *Conference on Knowledge Discovery and Data Mining* (Simoudis E., Han J., Fayyad U. eds.)  
786 AAAI Press, Portland, Oregon, 226–231.
- 787 Evanno G., Regnaut S., Goudet J. 2005. Detecting the number of clusters of individuals using the  
788 software STRUCTURE: a simulation study. *Mol. Ecol.* 14.:2611-2620  
789 <https://doi.org/10.1111/j.1365-294X.2005.02553.x>
- 790 Ezard T.H.G., Pearson P.N., Purvis A. 2010 Algorithmic approaches to aid species' delimitation  
791 in multidimensional morphospace. *BMC Evol. Biol.* 10:175 [https://doi.org/10.1186/1471-](https://doi.org/10.1186/1471-2148-10-175)  
792 [2148-10-175](https://doi.org/10.1186/1471-2148-10-175)
- 793 Faircloth B.C. 2013. Illumiprocessor: a trimmomatic wrapper for parallel adapter and quality  
794 trimming. Available from: <http://dx.doi.org/10.6079/J9ILL>.
- 795 Faircloth B.C. 2015. PHYLUCE is a software package for the analysis of conserved genomic  
796 loci. *Bioinformatics* 32:786-788 <https://doi.org/10.1093/bioinformatics/btv646>
- 797 Faircloth B.C. 2017. Identifying conserved genomic elements and designing universal bait sets to  
798 enrich them. *Meth. Ecol. Evol.* 8:1103-1112 <https://doi.org/10.1111/2041-210X.12754>
- 799 Fernández R., Giribet G. 2014. Phylogeography and species delimitation in the New Zealand  
800 endemic, genetically hypervariable harvestman species, *Aoraki denticulata* (Arachnida,  
801 Opiliones, Cyphophthalmi). *Invertebr. Syst.* 28:401-414 <https://doi.org/10.1071/IS14009>

- 802 Gnaspini P. 2007. Development. Pages 455-472 in *Harvestmen: The biology of Opiliones* (Pinto-  
803 da-Rocha R., Machado G., Giribet G. eds.). Cambridge (MA) and London, England: Harvard  
804 University Press.
- 805 Goodfellow I., Bengio Y., Courville A., Bengio Y. 2016. *Deep learning*. Cambridge (MA): MIT  
806 Press.
- 807 Gottscho A.D., Wood D.A., Vandergast A.G., Lemos-Espinal J., Gatesy J., Reeder T.W. 2017.  
808 Lineage diversification of fringe-toed lizards (Phrynosomatidae: *Uma notata* complex) in the  
809 Colorado Desert: Delimiting species in the presence of gene flow. *Mol. Phylogenet. Evol.*  
810 106:103-117 <https://doi.org/10.1016/j.ympev.2016.09.008>
- 811 Grabherr M.G., Haas B.J., Yassour M., Levin J.Z., Thompson D.A., Amit I., Adiconis X., Fan  
812 L., Raychowdhury R., Zeng Q., Chen Z., Mauceli E., Hacohen N., Gnirke A., Rhind N., Di  
813 Palma F., Birren B.W., Nusbaum C., Lindblad-Toh K., Friedman N., Regev A. 2011. Full-  
814 length transcriptome assembly from RNA-Seq data without a reference genome. *Nat.*  
815 *Biotechnol.* 29:644 <https://doi.org/10.1038/nbt.1883>
- 816 Guillot G., Renaud S., Ledevin R., Michaux J., Claude J. 2012. A unifying model for the analysis  
817 of phenotypic, genetic, and geographic data. *Syst. Biol.* 61:897-911  
818 <https://doi.org/10.1093/sysbio/sys038>
- 819 Harvey M.S. 2002. Short-range endemism amongst the Australian fauna: some examples from  
820 non-marine environments. *Invertebr. Syst.* 16:555-570 <https://doi.org/10.1071/IS02009>
- 821 Harvey M.G., Smith B.T., Glenn T.C., Faircloth B.C., Brumfield R.T. 2016. Sequence capture  
822 versus restriction site associated DNA sequencing for shallow systematics. *Syst. Biol.*  
823 65:910-924 <https://doi.org/10.1093/sysbio/syw036>



- 824 Hedin M.C. 1997. Molecular phylogenetics at the population/species interface in cave spiders of  
825 the Southern Appalachians (Araneae: Nesticidae: *Nesticus*). *Mol. Biol. Evol.* 14:309-324.
- 826 Hedin M. 2015. High-stakes species delimitation in eyeless cave spiders (*Cicurina*, Dictynidae,  
827 Araneae) from central Texas. *Mol. Ecol.* 24:346-361 <https://doi.org/10.1111/mec.13036>
- 828 Hedin M., Starrett J., Hayashi C. 2013. Crossing the uncrossable: novel trans-valley  
829 biogeographic patterns revealed in the genetic history of low-dispersal mygalomorph spiders  
830 (Antrodiaetidae, *Antrodiaetus*) from California. *Mol. Ecol.* 22:508-526  
831 <https://doi.org/10.1111/mec.12130>
- 832 Hedin M., Carlson D., Coyle F. 2015. Sky island diversification meets the multispecies  
833 coalescent–divergence in the spruce-fir moss spider (*Microhexura montivaga*, Araneae,  
834 Mygalomorphae) on the highest peaks of southern Appalachia. *Mol. Ecol.* 24:3467-3484.  
835 <https://doi.org/10.1111/mec.13248>
- 836 Hedin M., Derkarabetian S., Blair J., Paquin P. 2018. Sequence capture phylogenomics of  
837 eyeless *Cicurina* spiders from Texas caves, with emphasis on US federally-endangered  
838 species from Bexar County (Araneae, Hahniidae). *ZooKeys* 769:49  
839 <https://doi.org/10.3897/zookeys.769.25814>
- 840 Jombart T. 2008. adegenet: a R package for the multivariate analysis of genetic markers.  
841 *Bioinformatics* 24:1403-1405 <https://doi.org/10.1093/bioinformatics/btn129>
- 842 Jombart T., Ahmed I. 2011 adegenet 1.3-1: new tools for the analysis of genome-wide SNP data.  
843 *Bioinformatics* 27:3070-3071 <https://doi.org/10.1093/bioinformatics/btr521>
- 844 Kass R.E., Raftery A.E. 1995. Bayes factors. *J. Am. Stat. Assoc.* 90:773-795
- 845 Kassambara A., Mundt F. 2017. factoextra: Extract and Visualize the Results of Multivariate  
846 Data Analyses. R package version 1.0.5.

- 847 Katoh K., Standley D.M. 2013. MAFFT multiple sequence alignment software version 7:  
848 improvements in performance and usability. *Mol. Biol. Evol.* 30:772-780  
849 <https://doi.org/10.1093/molbev/mst010>
- 850 Kearse M., Moir R., Wilson A., Stones-Havas S., Cheung M., Sturrock S., Buxton S., Cooper A.,  
851 Markowitz S., Duran C., Thierer T., Ashton B., Meintjes P., Drummond A. 2012. Geneious  
852 Basic: an integrated and extendable desktop software platform for the organization and  
853 analysis of sequence data. *Bioinformatics* 28:1647-1649  
854 <https://doi.org/10.1093/bioinformatics/bts199>
- 855 Kern A.D., Schrider D.R. 2018. diploS/HIC: an updated approach to classifying selective  
856 sweeps. *G3-Genes Genom. Genet.* g3:200262. <https://doi.org/10.1534/g3.118.200262>
- 857 Kingma D.P., Welling M. 2013. Auto-encoding variational Bayes. In: *Proceedings of the*  
858 *International Conference on Learning Representations (ICLR)*. [arXiv:1312.6114v10](https://arxiv.org/abs/1312.6114v10)  
859 [stat.ML]
- 860 Kopelman N.M., Mayzel J., Jakobsson M., Rosenberg N.A., Mayrose I. 2015. Clumpak: a  
861 program for identifying clustering modes and packaging population structure inferences  
862 across K. *Mol. Ecol. Resour.* 15:1179-1191 <https://doi.org/10.1111/1755-0998.12387>
- 863 Leaché A.D., Koo M.S., Spencer C.L., Papenfuss T.J., Fisher R.N., McGuire J.A. (2009)  
864 Quantifying ecological, morphological, and genetic variation to delimit species in the coast  
865 horned lizard species complex (*Phrynosoma*). *Proc. Nat. Acad. Sci.* 106:12418-12423  
866 <https://doi.org/10.1073/pnas.0906380106>
- 867 Leaché A.D., Fujita M.K., Minin V.N., Bouckaert R.R. 2014. Species delimitation using  
868 genome-wide SNP data. *Syst. Biol.* 63:534-542. <https://doi.org/10.1093/sysbio/syu018>

- 869 Leaché, A.D., McElroy M.T., Trinh A. 2018 A genomic evaluation of taxonomic trends through  
870 time in coast horned lizards (genus *Phrynosoma*). *Mol. Ecol.* 27(13):2884-2895  
871 <https://doi.org/10.1111/mec.14715>
- 872 Li H., Durbin R. 2009. Fast and accurate short read alignment with Burrows–Wheeler transform.  
873 *Bioinformatics* 25:1754-1760 <https://doi.org/10.1093/bioinformatics/btp324>
- 874 Li H., Handsaker B., Wysoker A., Fennell T., Ruan J., Homer N., Marth G., Abecasis G., Durbin  
875 R., 1000 Genome Data Processing Subgroup. 2009. The sequence alignment/map format and  
876 SAMtools. *Bioinformatics* 25:2078-2079 <https://doi.org/10.1093/bioinformatics/btp352>
- 877 Liaw A., Wiener M. 2002. Classification and Regression by randomForest. *R News* 2:18-22.
- 878 Maechler M., Rousseeuw P., Struyf A., Hubert M., Hornik K. 2018. cluster: Cluster Analysis  
879 Basics and Extensions. R package version 2.0.7-1.
- 880 Mallet L., Bitard-Feildel T., Cerutti F., Chiapello H. 2017. PhyloOligo: a package to identify  
881 contaminant or untargeted organism sequences in genome assemblies. *Bioinformatics*  
882 33:3283-3285 <https://doi.org/10.1093/bioinformatics/btx396>
- 883 McCormack J.E., Tsai W.L., Faircloth B.C. 2016. Sequence capture of ultraconserved elements  
884 from bird museum specimens. *Mol. Ecol. Resour.* 16:1189-1203  
885 <https://doi.org/10.1111/1755-0998.12466>
- 886 McInnes L., Healy, J. 2018. Umap: Uniform manifold approximation and projection for  
887 dimension reduction. [arXiv:1802.03426v1](https://arxiv.org/abs/1802.03426v1) [stat.ML]
- 888 McKenna A., Hanna M., Banks E., Sivachenko A., Cibulskis K., Kernytsky A., Garimella K.,  
889 Altshuler D., Gabriel S., Daly M., DePristo M.A. 2010. The Genome Analysis Toolkit: a  
890 MapReduce framework for analyzing next-generation DNA sequencing data. *Genome. Res.*  
891 20:1297-1303 <https://doi.org/10.1101/gr.107524.110>

- 892 Newman C.E., Austin C.C. 2016. Sequence capture and next-generation sequencing of  
893 ultraconserved elements in a large-genome salamander. *Mol. Ecol.* 25:6162-6174  
894 <https://doi.org/10.1111/mec.13909>
- 895 Niemiller M.L., Near T.J., Fitzpatrick B.M. 2012. Delimiting species using multilocus data:  
896 diagnosing cryptic diversity in the southern cavefish, *Typhlichthys subterraneus* (Teleostei:  
897 Amblyopsidae). *Evolution* 66:846-866. <https://doi.org/10.1111/j.1558-5646.2011.01480.x>
- 898 Olteanu M., Nicolas V., Schaeffer B., Denys C., Missouf A.-D., Kennis J., Larédo C. 2013.  
899 Nonlinear projection methods for visualizing barcode data and application on two data sets.  
900 *Mol. Ecol. Resour.* 13:976–90 <https://doi.org/10.1111/1755-0998.12047>
- 901 Pedregosa F., Varoquaux G., Gramfort A., Michel V., Thirion B., Grisel O., Blondel M.,  
902 Prettenhofer P., Weiss R., Dubourg V., Vanderplas J., Passos A., Cournapeau D., Brucher  
903 M., Perrot M., Duchesney É. 2011. Scikit-learn: Machine learning in Python. *J. Mach. Learn.*  
904 *Res.* 12:2825-2830
- 905 Pei J., Chong C., Xin L., Bin L., Yufeng W. 2018. CLADES: A classification-based machine  
906 learning method for species delimitation from population genetic data. *Mol. Ecol. Resour.*  
907 18:1144-1156. <https://doi.org/10.1101/282608>
- 908 Pritchard J.K., Stephens M., Donnelly P. 2000. Inference of population structure using  
909 multilocus genotype data. *Genetics* 155:945-959
- 910 Pudlo P., Marin J.M., Estoup A., Cornuet J.M., Gautier M., Robert C.P. 2016. Reliable ABC  
911 Model Choice via Random Forests. *Bioinformatics* 32:859–66  
912 <https://doi.org/10.1093/bioinformatics/btv684>
- 913 R Core Team (2018) R: A Language and Environment for Statistical Computing. R Foundation  
914 for Statistical Computing. Vienna, Austria. <https://www.R-project.org>.

- 915 Rousseeuw P.J. 1987. Silhouettes: a graphical aid to the interpretation and validation of cluster  
916 analysis. *J. Comp. Appl. Math.* 20:53-65.
- 917 Ruane S., Austin C.C. 2017. Phylogenomics using formalin-fixed and 100+ year-old intractable  
918 natural history specimens. *Mol. Ecol. Resour.* 17:1003-1008 [https://doi.org/10.1111/1755-](https://doi.org/10.1111/1755-0998.12655)  
919 [0998.12655](https://doi.org/10.1111/1755-0998.12655)
- 920 Satler J.D., Carstens B.C., Hedin M. 2013 Multilocus Species Delimitation in a Complex of  
921 Morphologically Conserved Trapdoor Spiders (Mygalomorphae, Antrodiaetidae, *Aliatypus*).  
922 *Syst. Biol.* 62:805-823 <https://doi.org/10.1093/sysbio/syt041>
- 923 Schlick-Steiner B.C., Steiner F.M., Seifert B., Stauffer C., Christian E., Crozier R.H. 2010.  
924 Integrative taxonomy: a multisource approach to exploring biodiversity. *Ann. Rev. Entomol.*  
925 55:421-438 <https://doi.org/10.1146/annurev-ento-112408-085432>
- 926 Schrider D.R., Kern A.D. 2016. S/HIC: robust identification of soft and hard sweeps using  
927 machine learning. *PLoS Genet.* 12:e1005928 <https://doi.org/10.1371/journal.pgen.1005928>
- 928 Schrider D.R., Kern A.D. 2018. Supervised machine learning for population genetics: a new  
929 paradigm. *Trends Genet.* 34:301-312 <https://doi.org/10.1016/j.tig.2017.12.005>
- 930 Scrucca L., Fop M., Murphy T.B. Raftery A.E. 2017. mclust 5: clustering, classification and  
931 density estimation using Gaussian finite mixture models. *The R Journal* 8/1:205-233
- 932 Seifert B., Ritz M., Csősz S. 2014. Application of exploratory data analyses opens a new  
933 perspective in morphology-based alpha-taxonomy of eusocial organisms. *Myrmecol. News*  
934 19:1-15
- 935 Smith B.T., Harvey M.G., Faircloth B.C., Glenn T.C., Brumfield R.T. 2013. Target capture and  
936 massively parallel sequencing of ultraconserved elements for comparative studies at shallow  
937 evolutionary time scales. *Syst. Biol.* 63:83-95 <https://doi.org/10.1093/sysbio/syt061>

- 938 Smith M.L., Ruffley M., Espíndola A., Tank D.C., Sullivan J., Carstens B.C. 2017. Demographic  
939 model selection using random forests and the site frequency spectrum. *Mol. Ecol.* 26:4562–  
940 73 <https://doi.org/10.1111/mec.14223>
- 941 Smith M.L., Carstens B.C. 2018. Disentangling the process of speciation using machine learning.  
942 *BioRxiv.* <https://doi.org/10.1101/356345>
- 943 Solís-Lemus C., Knowles L.L., Ané C. 2015. Bayesian species delimitation combining multiple  
944 genes and traits in a unified framework. *Evolution* 69:492-507  
945 <https://doi.org/10.1111/evo.12582>
- 946 Sproul J.S., Maddison D.R. 2017. Sequencing historical specimens: successful preparation of  
947 small specimens with low amounts of degraded DNA. *Mol. Ecol. Resour.* 17:1183-1201  
948 <https://doi.org/10.1111/1755-0998.12660>
- 949 Srivastava N., Hinton G., Krizhevsky A., Sutskever I., Salakhutdinov R. 2014. Dropout: a simple  
950 way to prevent neural networks from overfitting. *J. Mach. Learn. Res.* 15:1929-1958.
- 951 Stamatakis A. 2014. RAxML version 8: a tool for phylogenetic analysis and post-analysis of  
952 large phylogenies. *Bioinformatics* 30:1312-1313  
953 <https://doi.org/10.1093/bioinformatics/btu033>
- 954 Starrett J., Derkarabetian S., Richart C.H., Cabrero A., Hedin M. 2016. A new monster from  
955 southwest Oregon forests: *Cryptomaster behemoth* sp. n. (Opiliones, Laniatores,  
956 Travunioidea). *ZooKeys* 555:11-35 <https://doi.org/10.3897/zookeys.555.6274>
- 957 Starrett J., Derkarabetian S., Hedin M., Bryson Jr R.W., McCormack J.E., Faircloth B.C. 2017.  
958 High phylogenetic utility of an ultraconserved element probe set designed for Arachnida.  
959 *Mol. Ecol. Resour.* 17:812-823 <https://doi.org/10.1111/1755-0998.12621>

- 960 Steele C.A., Carstens B.C., Storfer A., Sullivan J. 2005. Testing hypotheses of speciation timing  
961 in *Dicamptodon copei* and *Dicamptodon aterrimus* (Caudata: Dicamptodontidae). *Mol.*  
962 *Phylogenet. Evol.* 36:90-100 <https://doi.org/10.1016/j.ympev.2004.12.001>
- 963 Sukumaran J., Economo E.P., Knowles L.L. 2015. Machine learning biogeographic processes  
964 from biotic patterns: a new trait-dependent dispersal and diversification model with model  
965 choice by simulation-trained discriminant analysis. *Syst. Biol.* 65:525-545  
966 <https://doi.org/10.1093/sysbio/syv121>
- 967 Sukumaran J., Knowles L.L. 2017. Multispecies coalescent delimits structure, not species. *Proc.*  
968 *Nat. Acad. Sci.* 114:1607-1612 <https://doi.org/10.1073/pnas.1607921114>
- 969 Talavera G., Castresana J. 2007. Improvement of phylogenies after removing divergent and  
970 ambiguously aligned blocks from protein sequence alignments. *Syst. Biol.* 56:564-577  
971 <https://doi.org/10.1080/10635150701472164>
- 972 Van der Auwera G.A., Carneiro M.O., Hartl C., Poplin R., Del Angel G., Levy-Moonshine A.,  
973 Jordan T., Shakir K., Roazen D., Thibault J., Banks E., Garimella K.V., Altshuler D., Gabriel  
974 S., DePristo M.A. 2013. From FastQ data to high-confidence variant calls: the genome  
975 analysis toolkit best practices pipeline. *Curr. Protocol Bioinformatics* 43:11-10  
976 <https://doi.org/10.1002/0471250953.bi1110s43>
- 977 Van der Maaten L.V.D., Hinton G. 2008. Visualizing data using t-SNE. *J. Mach. Learn. Res.*  
978 9:2579-2605.
- 979 Venables W.N., Ripley B.D. 2002. Statistics and Computing. *Modern Applied Statistics with S.*  
980 New York: Springer.
- 981 Wattenberg M., Viégas F., Johnson I. 2016. How to Use t-SNE Effectively, Distill.  
982 <http://doi.org/10.23915/distill>

- 983 Weitschek E., Fisson G., Felici G. 2014. Supervised DNA Barcodes species classification:  
984 analysis, comparisons and results. *Biodata Min.* 7:4 <https://doi.org/10.1186/1756-0381-7-4>
- 985 Wiens J.J., Graham C.H. 2005. Niche conservatism: integrating evolution, ecology, and  
986 conservation biology. *Ann. Rev. Ecol. Evol. Syst.* 36:519-539  
987 <https://doi.org/10.1146/annurev.ecolsys.36.102803.095431>
- 988 Yang Z., Rannala B. 2010. Bayesian species delimitation using multilocus sequence data. *Proc.*  
989 *Nat. Acad. Sci.* 107:9264-9269 <https://doi.org/10.1073/pnas.0913022107>
- 990 Yoshida R., Fukumizu K., Vogiatzis C. 2016. Multilocus phylogenetic analysis with gene tree  
991 clustering. *Ann. Oper. Res.* 1-21. <https://doi.org/10.1007/s10479-017-2456-9>
- 992 Zarza E., Faircloth B.C., Tsai W.L., Bryson Jr R.W., Klicka J., McCormack J.E. 2016. Hidden  
993 histories of gene flow in highland birds revealed with genomic markers. *Mol. Ecol.* 25:5144-  
994 5157 <https://doi.org/10.1111/mec.13813>
- 995 Zarza E., Connors E.M., Maley J.M., Tsai W.L.E., Heimes P., Kaplan M., McCormack J.E.  
996 2017. Combining next-generation sequencing and mtDNA data to uncover cryptic lineages of  
997 Mexican highland frogs. *bioRxiv.* <https://doi.org/10.1101/153601>  
998
